# Supplementary material for: Structurally-variable, rigid and optically-active D2 and D3 macrocycles possessing recognition properties towards C60
Source: Royal Society of Chemistry journal article supplement (doi:10.1039/b920867d), 2010-01-01
Supplement: b920867d.pdf [file b920867d.pdf]

## Supporting Information

# Structurally-Variable, Rigid and Optically-Active $D_2$ and $D_3$ Macrocycles Possessing Recognition Properties towards $C_{60}$

Carmine Coluccini,<sup>a</sup> Daniele Dondi,<sup>b</sup> Marco Caricato,<sup>a</sup> Angelo Taglietti,<sup>b</sup> Massimo Boiocchi,<sup>c</sup> and Dario Pasini\*<sup>a</sup>

*a) Department of Organic Chemistry, University of Pavia, Viale Taramelli, 10 – 27100 –Pavia, Italy.*

*Fax: +39 0382 987323; Tel: +39 0382 987835; E-mail: [dario.pasini@unipv.it](mailto:dario.pasini@unipv.it)*

*b) Department of General Chemistry, University of Pavia, Viale Taramelli 12, Pavia, Italy.*

*c) Centro Grandi Strumenti, University of Pavia, Via Bassi 21, Pavia, Italy.*

### Contents:

Table S1: crystallographic parameter table (page S2)

Table S2: chemical shift table (page S3)

Figures S1-S3: additional NMR spectra and titrations (pages S4-S6)

Figures S4-S12: UV/Vis titration graphs and best fit parameters (pages S7-S15)

Figure S13: calculated minima for macrocycle **4c** (page S16)

Copies of <sup>1</sup>H NMR, <sup>13</sup>C NMR and mass spectra (pages S17-S22)

Additional details on calculations (page S23-S53)

**Table S1.** Crystal data for investigated crystals.

|                                                                            | <b>3b</b>                                       | <b>3c</b>                                       |
|----------------------------------------------------------------------------|-------------------------------------------------|-------------------------------------------------|
| Formula                                                                    | C <sub>70</sub> H <sub>60</sub> O <sub>14</sub> | C <sub>70</sub> H <sub>60</sub> O <sub>14</sub> |
| <i>M</i>                                                                   | 1125.18                                         | 1125.18                                         |
| Colour                                                                     | colorless                                       | colorless                                       |
| Dimension [mm]                                                             | 0.43 x 0.36 x 0.15                              | 0.86 x 0.58 x 0.43                              |
| Crystal system                                                             | monoclinic                                      | monoclinic                                      |
| Space group                                                                | <i>P</i> 2 <sub>1</sub> (no.4)                  | <i>P</i> 2 <sub>1</sub> (no.4)                  |
| <i>a</i> [Å]                                                               | 10.423(2)                                       | 11.414 (2)                                      |
| <i>b</i> [Å]                                                               | 10.230(3)                                       | 20.620(3)                                       |
| <i>c</i> [Å]                                                               | 27.358(6)                                       | 12.643(4)                                       |
| $\beta$ [°]                                                                | 93.50(2)                                        | 91.47(2)                                        |
| <i>V</i> [Å <sup>3</sup> ]                                                 | 2911.7(12)                                      | 2974.7(11)                                      |
| <i>Z</i>                                                                   | 2                                               | 2                                               |
| $\rho_{\text{calcd}}$ [g cm <sup>-3</sup> ]                                | 1.283                                           | 1.256                                           |
| $\mu$ MoK $\alpha$ [mm <sup>-1</sup> ]                                     | 0.089                                           | 0.087                                           |
| Scan type                                                                  | $\omega$ scans                                  | $\omega$ scans                                  |
| $\theta$ range [°]                                                         | 1.5 - 25.1                                      | 1.5 - 25.1                                      |
| Measured reflections                                                       | 5970                                            | 6900                                            |
| Unique reflections                                                         | 5506                                            | 5419                                            |
| <i>R</i> <sub>int</sub>                                                    | 0.038                                           | 0.015                                           |
| Strong data [ <i>I</i> <sub>0</sub> >2 $\sigma$ ( <i>I</i> <sub>0</sub> )] | 2935                                            | 3884                                            |
| Refined parameters                                                         | 754                                             | 757                                             |
| <i>R</i> 1, <i>wR</i> 2 (strong data)                                      | 0.0689, 0.1588                                  | 0.0482, 0.1202                                  |
| <i>R</i> 1, <i>wR</i> 2 (all data)                                         | 0.1470, 0.1980                                  | 0.0760, 0.1371                                  |
| GOF                                                                        | 1.045                                           | 1.031                                           |
| Max / min residuals [eÅ <sup>-3</sup> ]                                    | 0.20 / -0.24                                    | 0.22 / -0.13                                    |

**Table S2.** Selected  $^1\text{H}$  NMR chemical shifts for precursor **1** and macrocycles **3** and **4** in  $\text{CDCl}_3$  at room temperature.<sup>a</sup>

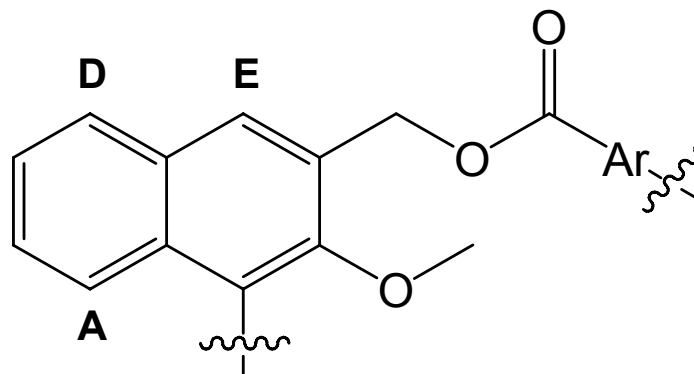

| Compound               | BINOL-A           | BINOL-D           | BINOL-E  | $\text{CH}_2$ | OMe      |
|------------------------|-------------------|-------------------|----------|---------------|----------|
| <b>1</b> <sup>b</sup>  | 7.15(d)           | 7.89 (d)          | 8.03 (s) | 4.98 (dd)     | 3.30 (s) |
| <b>3a</b> <sup>b</sup> | 7.02 (d)          | 7.95 (d)          | 8.03 (s) | 5.63 (dd)     | 2.88 (s) |
| <b>3b</b>              | 7.08 (d)          | 7.83 (d)          | 8.04 (s) | 5.62 (dd)     | 3.24 (s) |
| <b>3c</b> <sup>b</sup> | 7.10 (d)          | 7.95 (d)          | 8.19 (s) | 5.63 (dd)     | 3.48 (s) |
| <b>3d</b>              | N.D. <sup>c</sup> | 7.94 (d)          | 8.00 (s) | 5.64 (dd)     | 3.14 (s) |
| <b>4a</b> <sup>b</sup> | 7.06 (d)          | N.D. <sup>c</sup> | 8.08 (d) | 5.49(cdd)     | 3.07 (s) |
| <b>4b</b>              | 7.19 (d)          | 7.79 (d)          | 8.08 (s) | 5.67(cdd)     | 3.30 (s) |
| <b>4c</b> <sup>b</sup> | 7.10 (d)          | 7.93 (d)          | 8.13 (d) | 5.68 (cdd)    | 3.34 (s) |

<sup>a</sup> Spectra taken either at 200 MHz or 300 MHz with 5-10 mM sample concentration in  $\text{CDCl}_3$ . Peak multiplicity as follows: s singlet, bs broad singlet, d doublet, dd double doublet (AB system), cdd collapsed double doublet. <sup>b</sup> Data taken from reference 11. <sup>c</sup> Not unequivocally assigned.

**Figure S1.**  $^1\text{H}$  NMR spectra ( $\text{CDCl}_3$ , 300 MHz, room temperature) of macrocycles a) **3c**; b) **3a**; c) **3b**;  
d) **3d**.

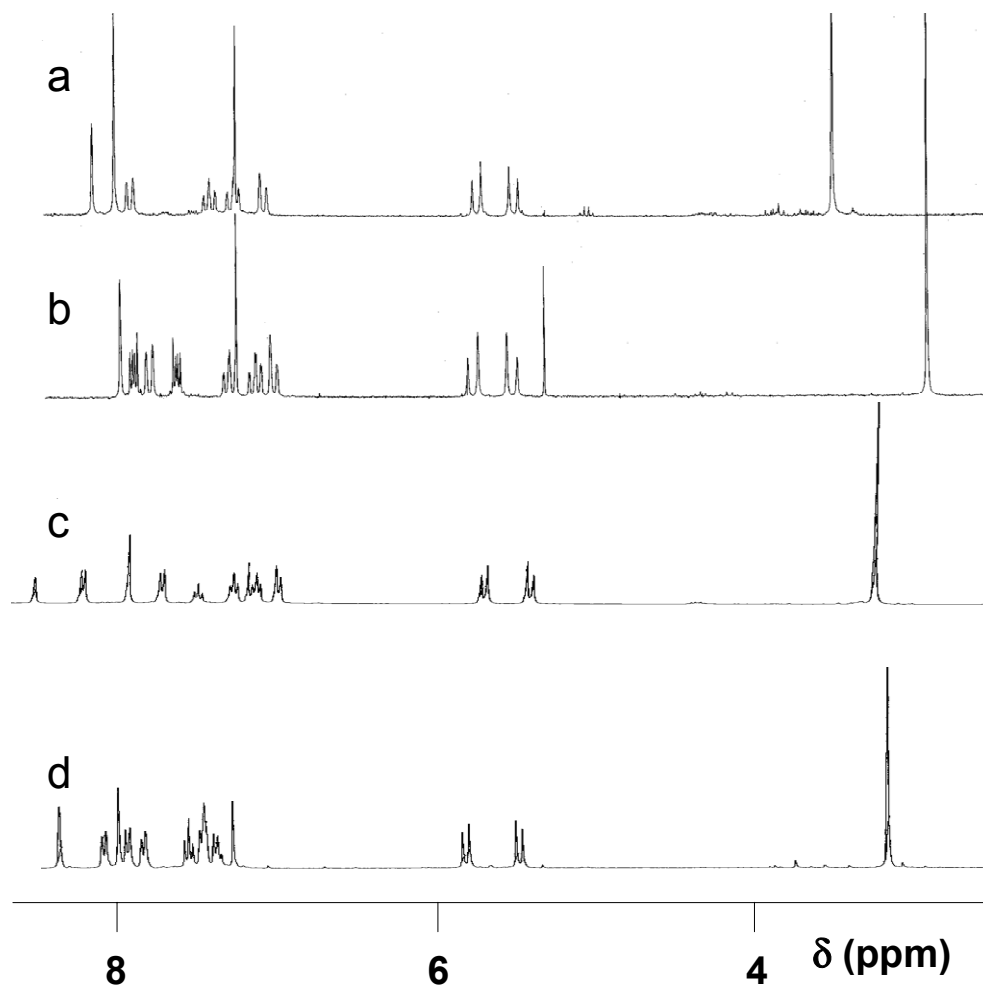

**Figure S2.**  $^1\text{H}$  NMR spectra (toluene- $d_8$ , 300 MHz, room temperature) of **3c** ( $10^{-3}$  M) in the presence of  $\text{C}_{60}$  (a: 0; b:  $3 \times 10^{-4}$  M; c:  $5.3 \times 10^{-4}$  M; d:  $1.2 \times 10^{-3}$  M).

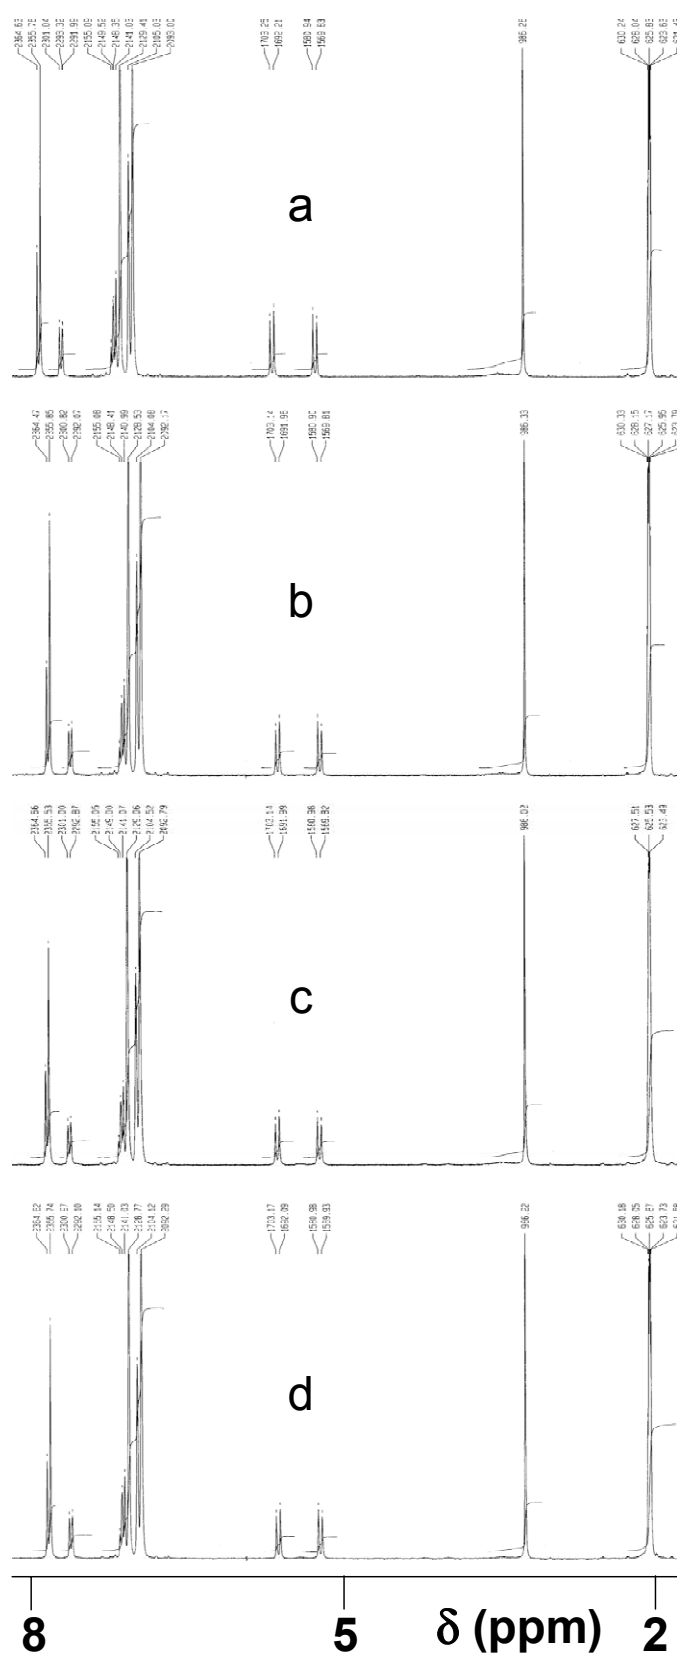

**Figure S3.**  $^1\text{H}$  NMR spectra (toluene- $d_8$ , 300 MHz, room temperature) of **4c** ( $10^{-3}$  M) in the presence of  $\text{C}_{60}$  (a: 0; b:  $1.7 \times 10^{-3}$  M; c:  $3.2 \times 10^{-3}$  M; d:  $6.9 \times 10^{-3}$  M).

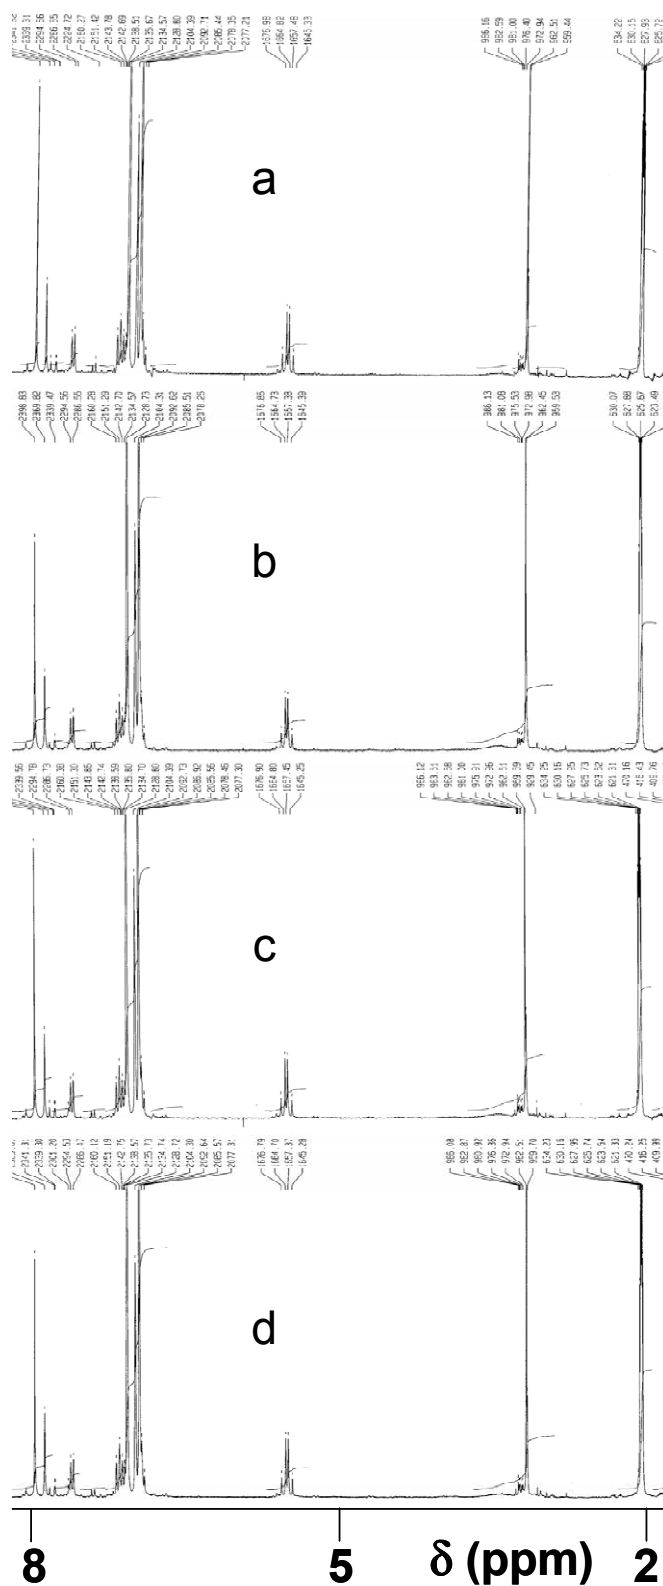

**Figure S4.** Best fitting and related parameters for the titration reported in Figure 5 (including titration endpoint, toluene, C<sub>60</sub> constant at 5 10<sup>-5</sup> M).

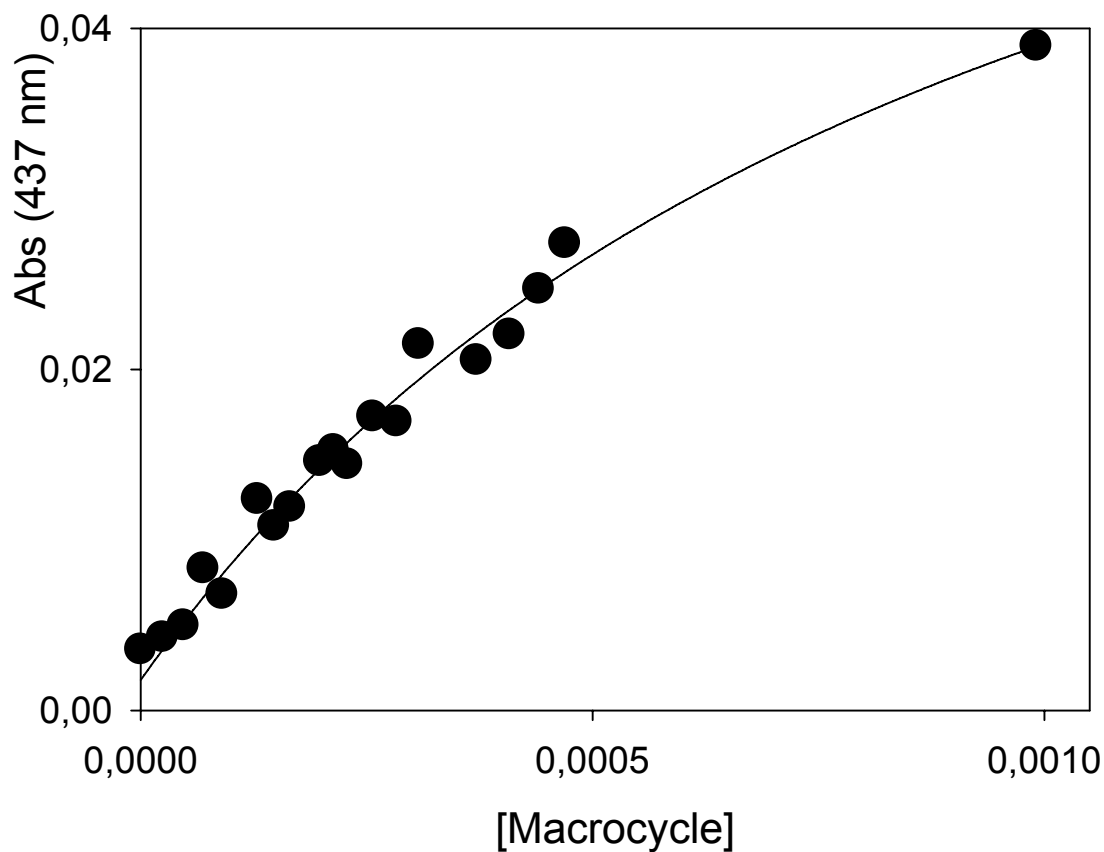

### Nonlinear Regression

**Data Source:** Data 1 in titolazione4creplicaSIinset.JNB

**Equation:** User-Defined; Untitled

$$f = (E - 15) * ((k * (0,00005 + x) + 1) - ((k * (0,00005 + x) + 1)^2 - 4 * (k^2) * 0,00005 * x)^{0.5}) / (2 * k) + 0,00005 * 15$$

| R      | Rsqr   | Adj Rsqr | Standard Error of Estimate |
|--------|--------|----------|----------------------------|
| 0,9901 | 0,9804 | 0,9792   | 0,0013                     |

### Std. Error

|                  |           |          |
|------------------|-----------|----------|
| Calcd $\epsilon$ | 1491,9284 | 148,4209 |
| Calcd $K_a$      | 1079,1666 | 164,4081 |



**Figure S5.** Best fitting and related parameters for the titration reported in Figure 5 (without titration endpoint, toluene, C<sub>60</sub> constant at 5 x 10<sup>-5</sup> M).

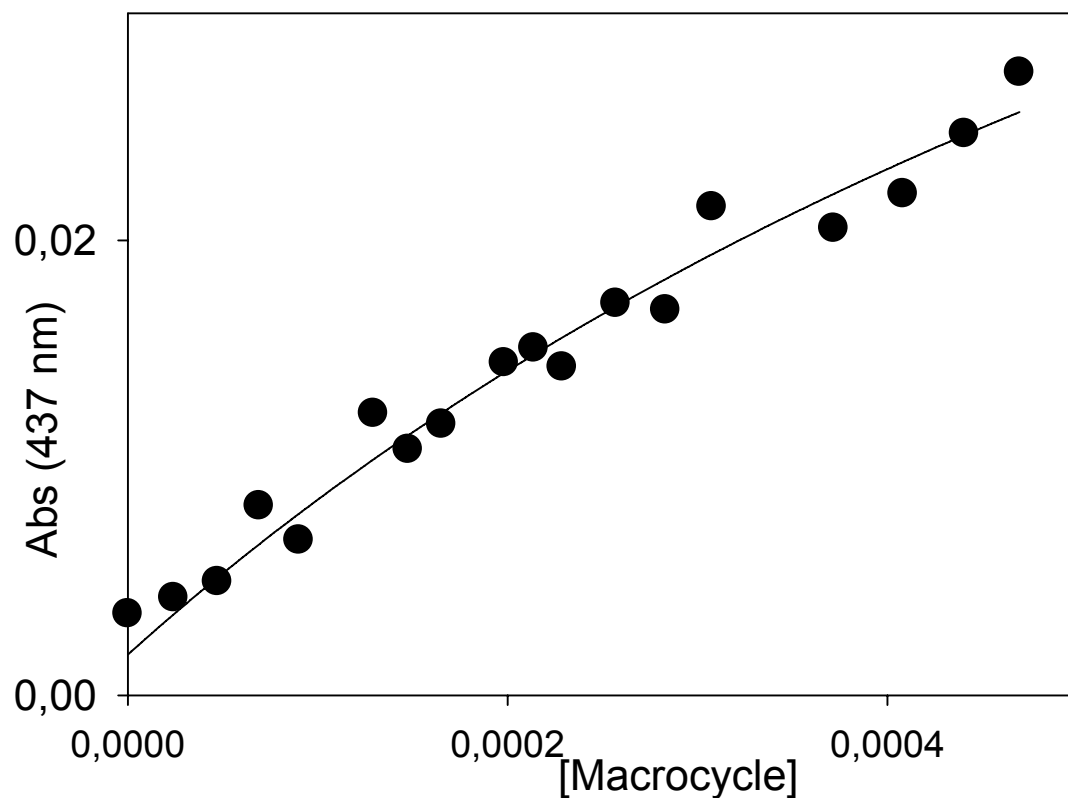

**Nonlinear Regression**

**Data Source:** Data 1 in titolazione4creplicaSIinset-finalpoint.JNB

**Equation:** User-Defined; Untitled

$$f=(E-15)*((k*(0,00005+x)+1)-((k*(0,00005+x)+1)^2-4*(k^2)*0,00005*x)^(0.5))/(2*k)+0,00005*15$$

| <b>R</b> | <b>Rsqr</b> | <b>Adj Rsqr</b> | <b>Standard Error of Estimate</b> |
|----------|-------------|-----------------|-----------------------------------|
| 0,9835   | 0,9673      | 0,9652          | 0,0013                            |

**Std. Error**

|                |           |          |
|----------------|-----------|----------|
| <b>Calcd ε</b> | 1466,5863 | 369,7897 |
|----------------|-----------|----------|

**Calcd  $K_a$**  1105,2024

395,3416

**Figure S6.** Replicate titration of macrocycle **4c** with C<sub>60</sub> (toluene, C<sub>60</sub> constant at 10<sup>-4</sup> M, inset absorbance taken at 437 nm).

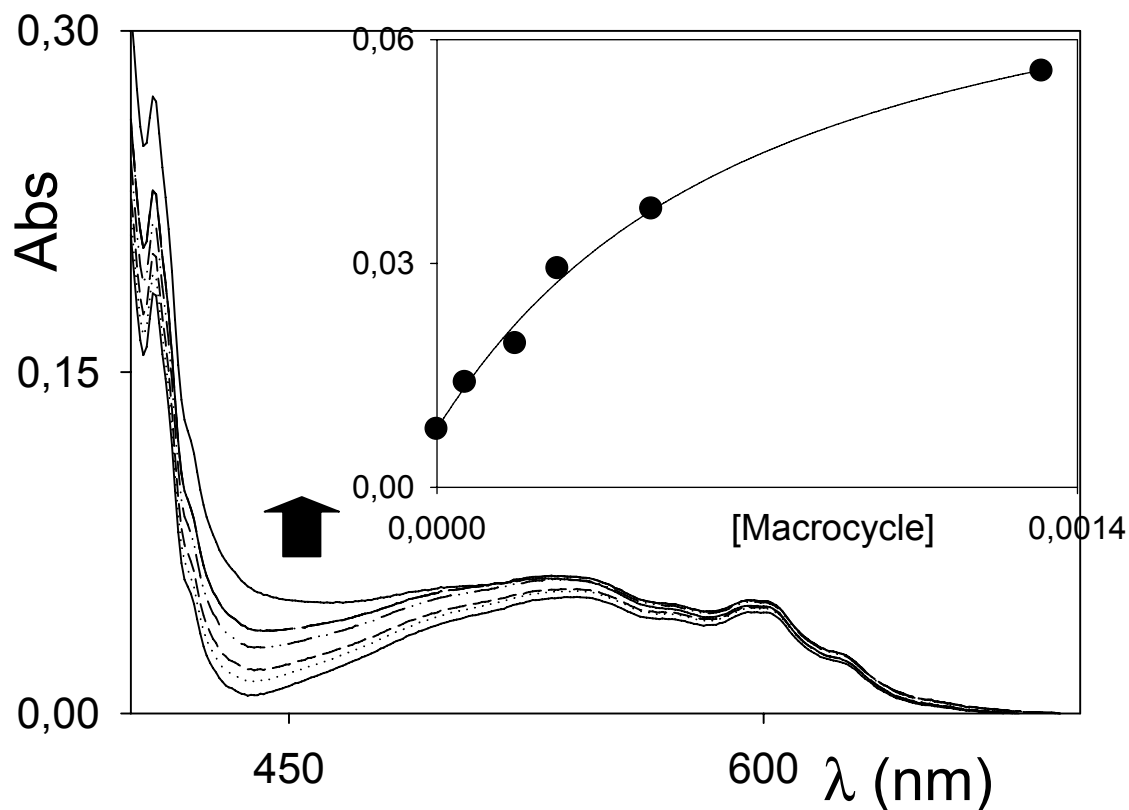

### Nonlinear Regression

**Data Source:** Data 1 in titolazione4crep.JNB

**Equation:** User-Defined; Untitled

$$f = ((E-15)*((k*(0,0001+x)+1)-((k*(0,0001+x)+1)^2-4*(k^2)*0,0001*x)^(0.5))/(2*k))+0,0001*15$$

R = 0,99663547

Rsqr = 0,99328226

dj Rsqr = 0,99160283

Coefficient

Std. Error

Calcd  $\epsilon$  1103,7146

76,0135

Calcd  $K_a$  1263,7541

354,7808

**Figure S7.** End point titration curve (broken line,  $C_{60}$   $10^{-4}$  M, macrocycle **4b**  $1.02 \times 10^{-3}$  M) vs  $C_{60}$  only (continuous line,  $C_{60}$   $10^{-4}$  M) for the experiment reported in Figure 6.

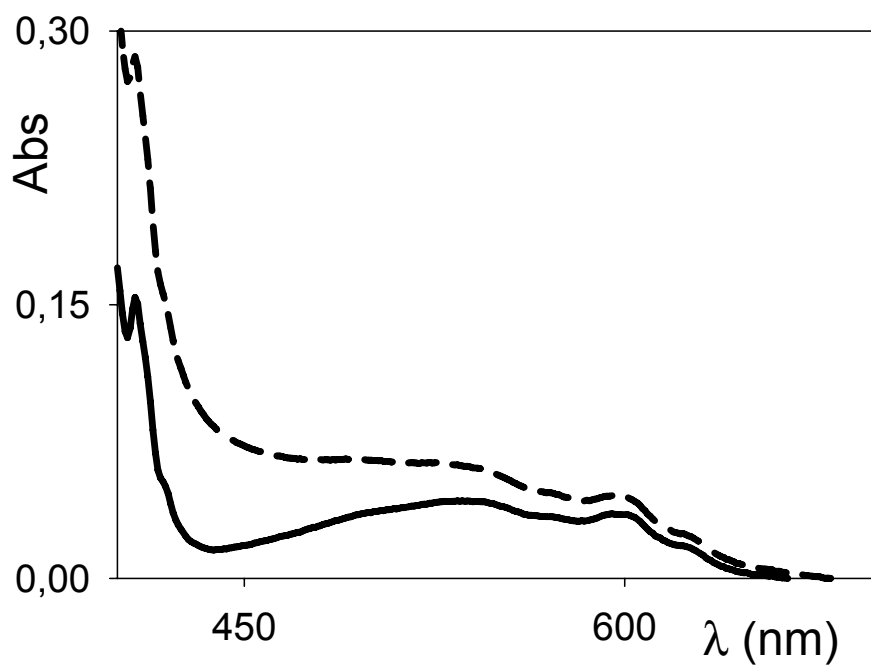

**Figure S8.** Best Fitting including end point titration for experiment reported in Figure 6 (fullerene  $10^{-4}$  M, macrocycle **4b** 0- $1.02 \times 10^{-3}$  M, 0-10 equivalents).

(see experimental section for parameter explanation)

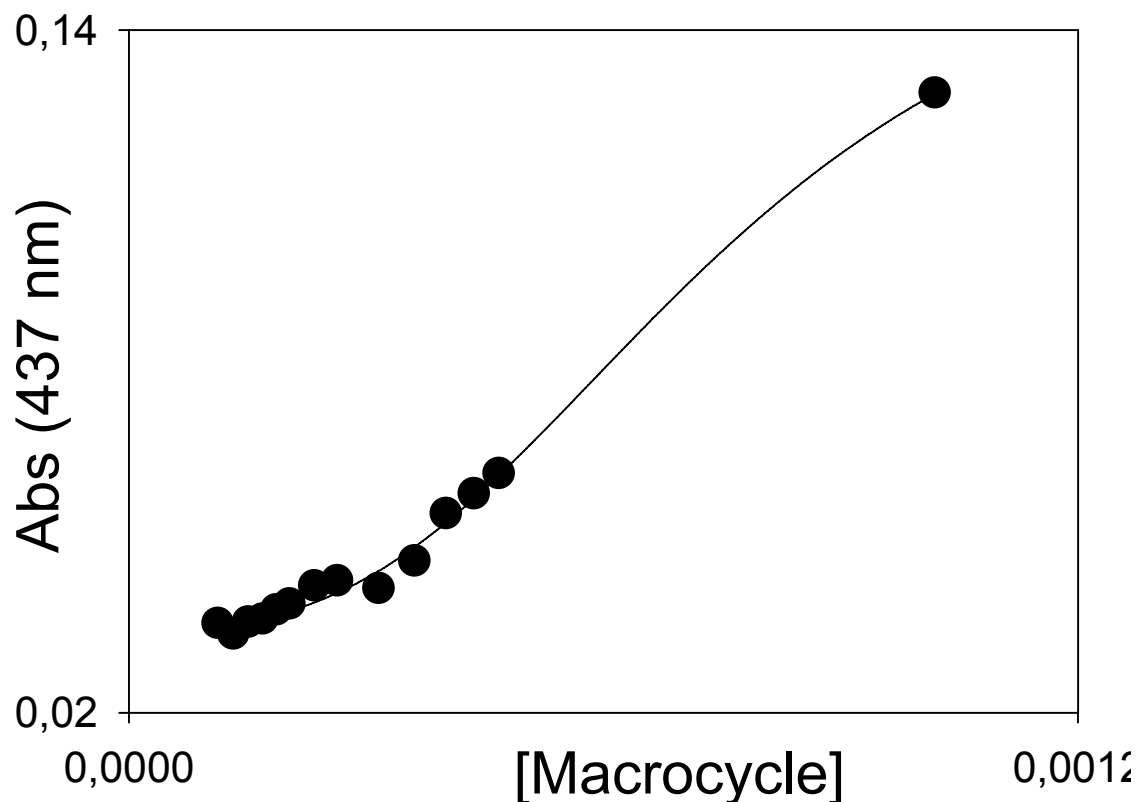

**Nonlinear Regression**

**Data Source: Data 1 in titolazione4bhillfitting-2.JNB**

**Equation: Sigmoidal; Hill, 4 Parameter**

$$f=y_0+a*x^b/(c^b+x^b)$$

| <b>R</b> | <b>Rsqr</b> | <b>Adj Rsqr</b> | <b>Standard Error of Estimate</b> |
|----------|-------------|-----------------|-----------------------------------|
|----------|-------------|-----------------|-----------------------------------|

|        |        |        |        |
|--------|--------|--------|--------|
| 0,9976 | 0,9951 | 0,9937 | 0,0019 |
|--------|--------|--------|--------|

|    | <b>Coefficient</b> | <b>Std. Error</b> |
|----|--------------------|-------------------|
| a  | 0,1323             | 0,0320            |
| b  | 2,9090             | 0,6294            |
| c  | 0,0008             | 0,0002            |
| y0 | 0,0351             | 0,0014            |

**Figure S9.** Fitting for the experiment reported in Figure 6 without end point (fullerene  $10^{-4}$  M, macrocycle **4b**  $0-4.6 \times 10^{-3}$  M, 0-4.6 equivalents).

(see experimental section for parameter explanation)

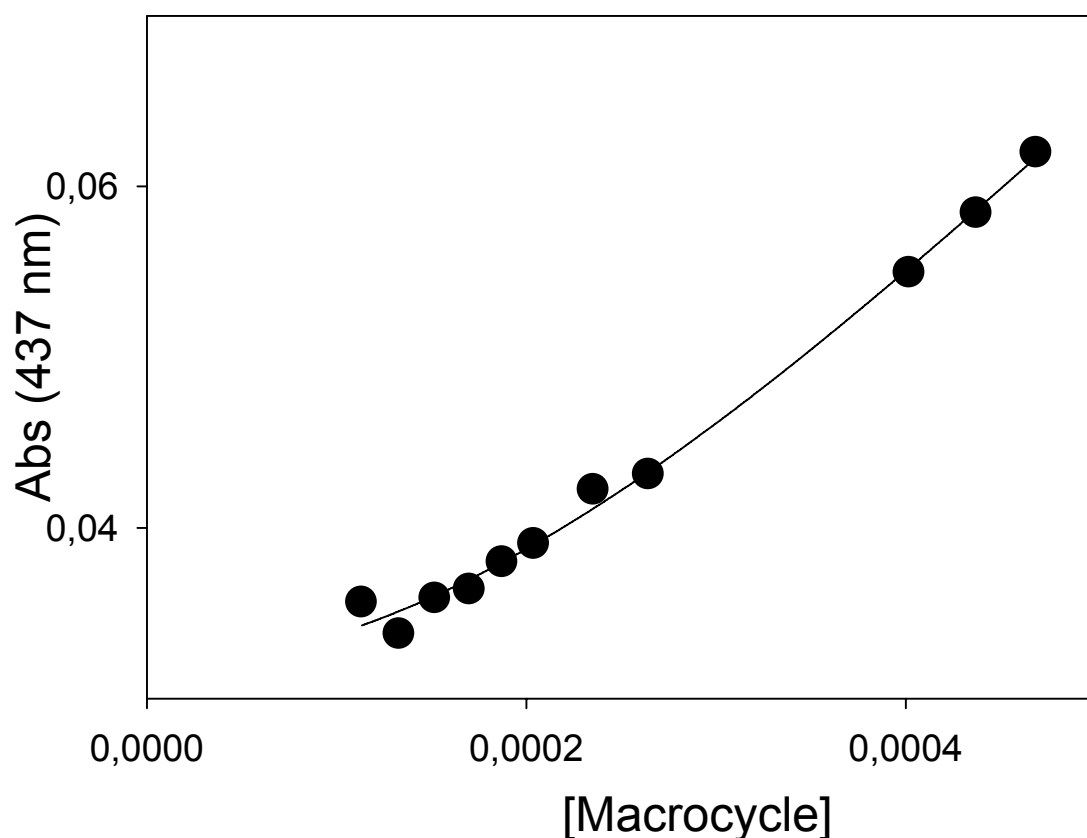

### Nonlinear Regression

**Data Source:** Data 1 in titolazione4bhillfitting-some points-endpoint SI.JNB

**Equation:** Sigmoidal; Hill, 4 Parameter

$$f=y_0+a*x^b/(c^b+x^b)$$

| <b>R</b> | <b>Rsqr</b> | <b>Adj Rsqr</b> | <b>Standard Error of Estimate</b> |
|----------|-------------|-----------------|-----------------------------------|
| 0,9973   | 0,9947      | 0,9924          | 0,0009                            |

|   | <b>Coefficient</b> | <b>Std. Error</b> |
|---|--------------------|-------------------|
| a | 0,1493             | 0,0949            |

|    |        |        |
|----|--------|--------|
| b  | 1,9360 | 0,1498 |
| c  | 0,0010 | 0,0002 |
| y0 | 0,0319 | 0,0025 |

**Figure S10.** Control titration of macrocycle **3c** with  $C_{60}$  (Toluene,  $C_{60}$  constant at  $2 \times 10^{-4}$  M).

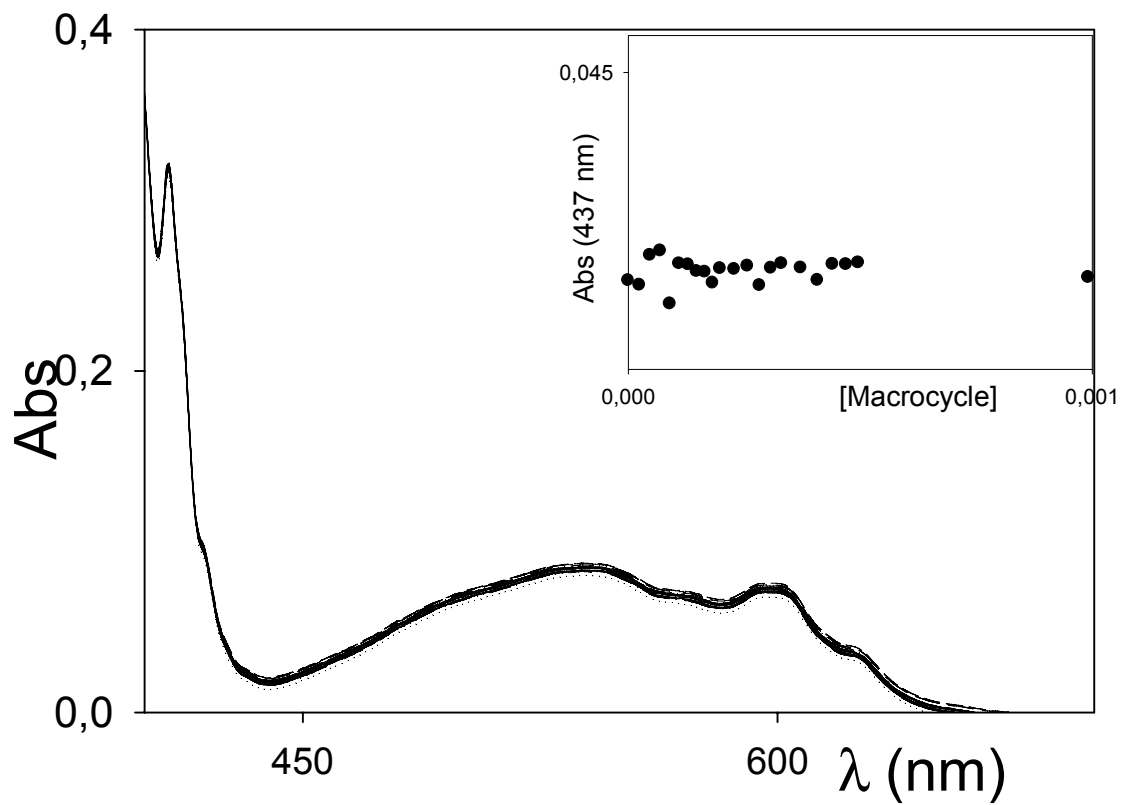



**Figure S11.** Control titration of terephthalic acid dimethyl ester with  $C_{60}$  (Toluene,  $C_{60}$  constant at  $5 \times 10^{-5}$  M).

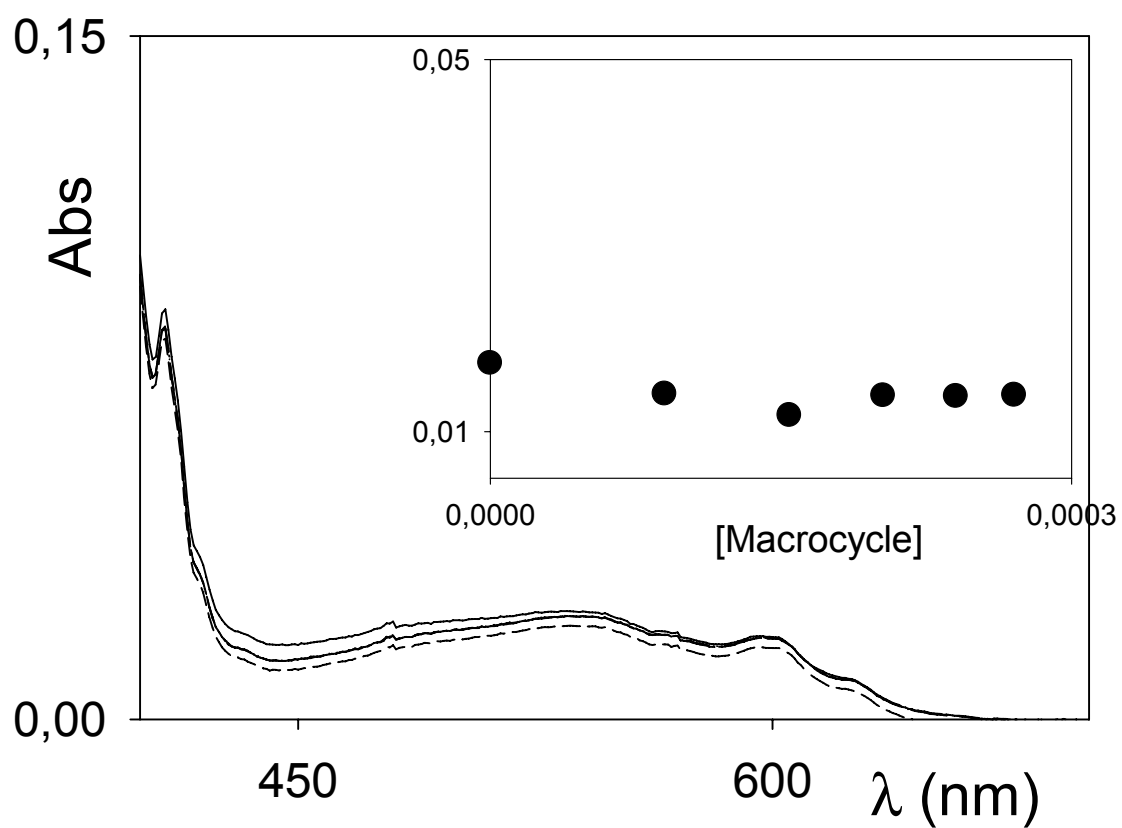

**Figure S12.** Control titration of 2,2'-dimethoxy-1,1'-binaphthyl with C<sub>60</sub> (Toluene, C<sub>60</sub> constant at 5 x 10<sup>-5</sup> M).

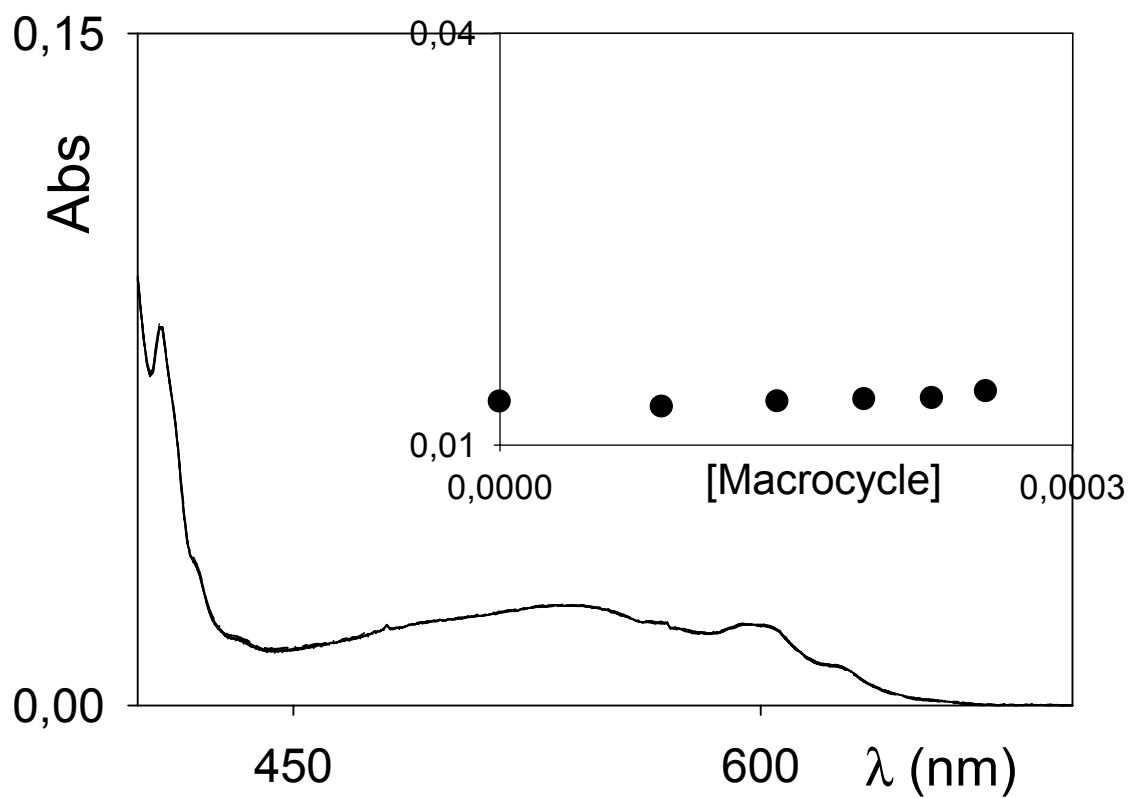

**Figure S13.** Optimized conformers of **4c**. a) collapsed structure; b) open structure.

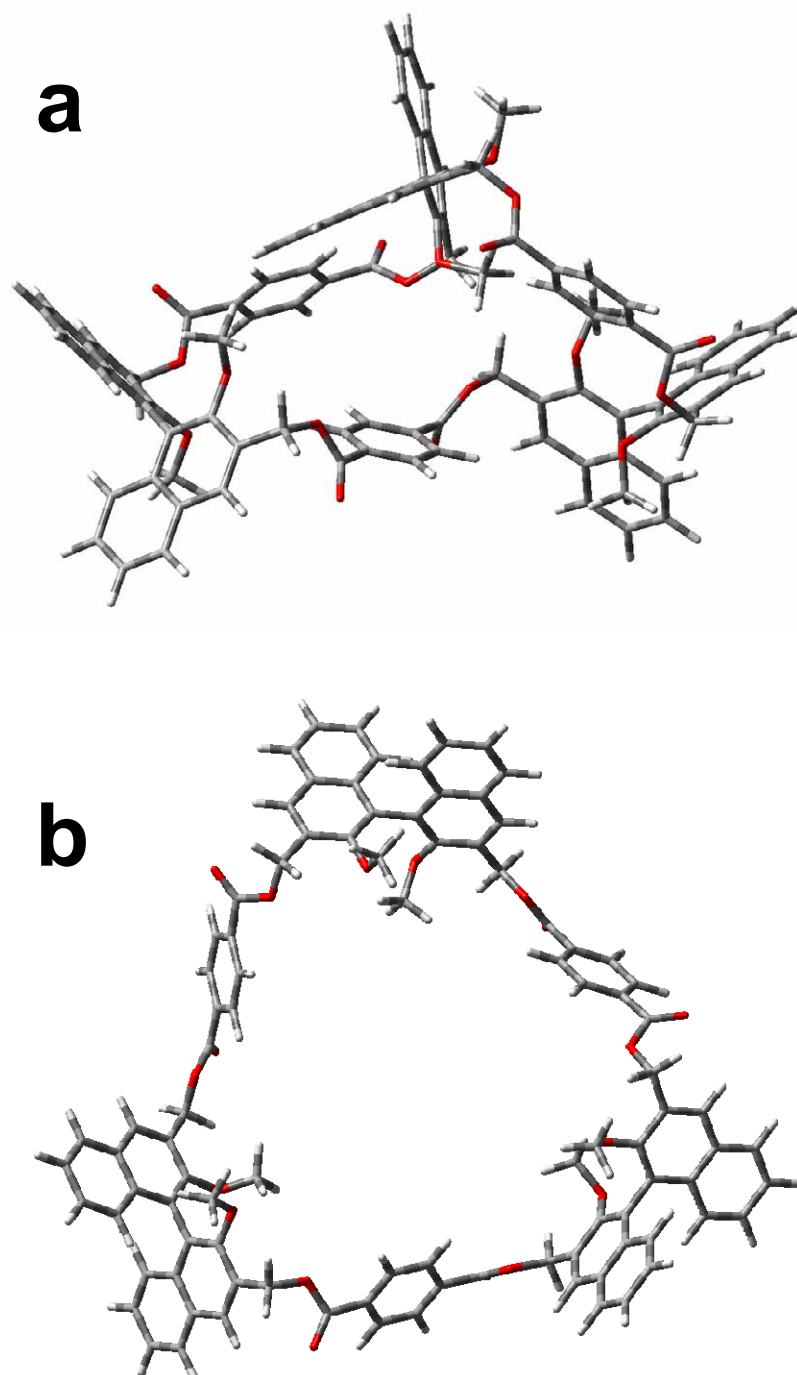

Macrocycle **3b**.

$^1\text{H}$  NMR ( $\text{CDCl}_3$ , 300 MHz)

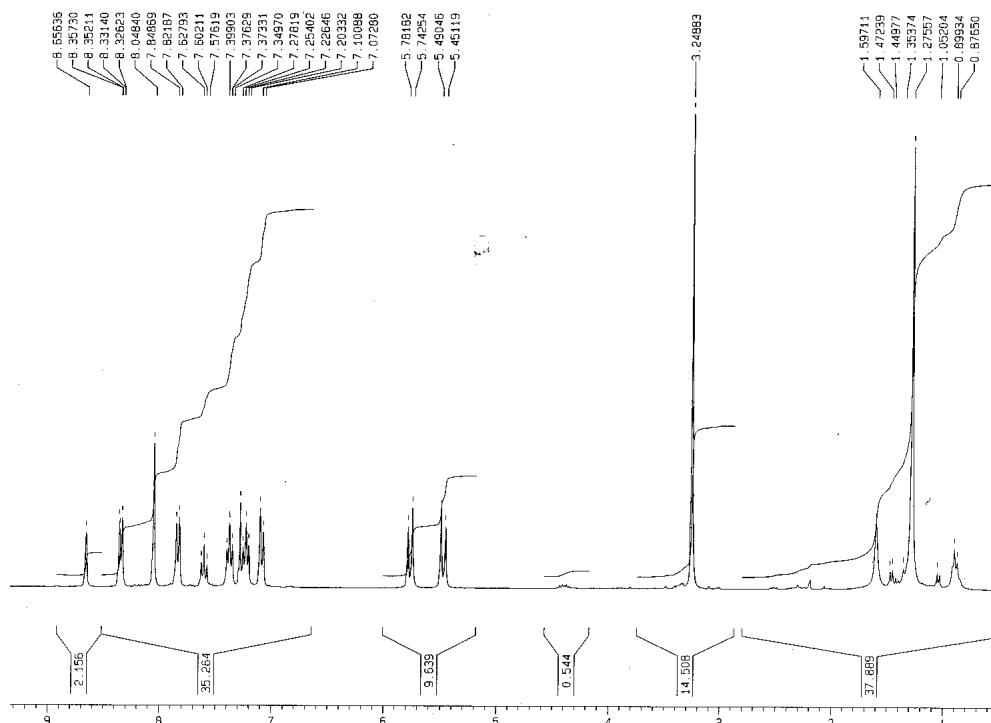

$^{13}\text{C}$  NMR ( $\text{CDCl}_3$ , 75 MHz)

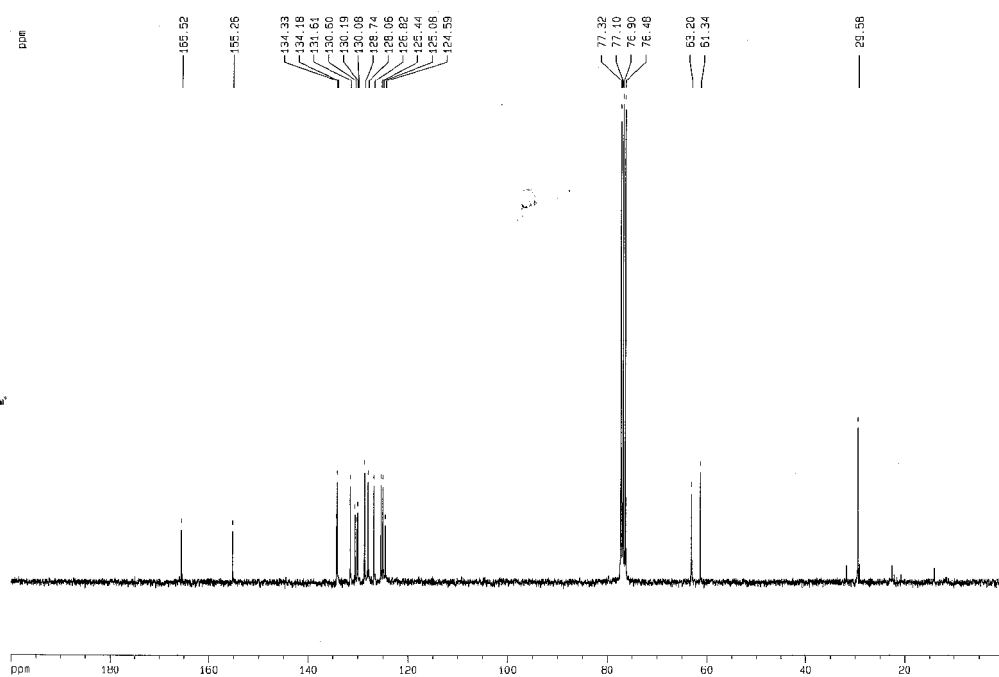

$^{13}\text{C}$  NMR DEPT ( $\text{CDCl}_3$ , 75 MHz)

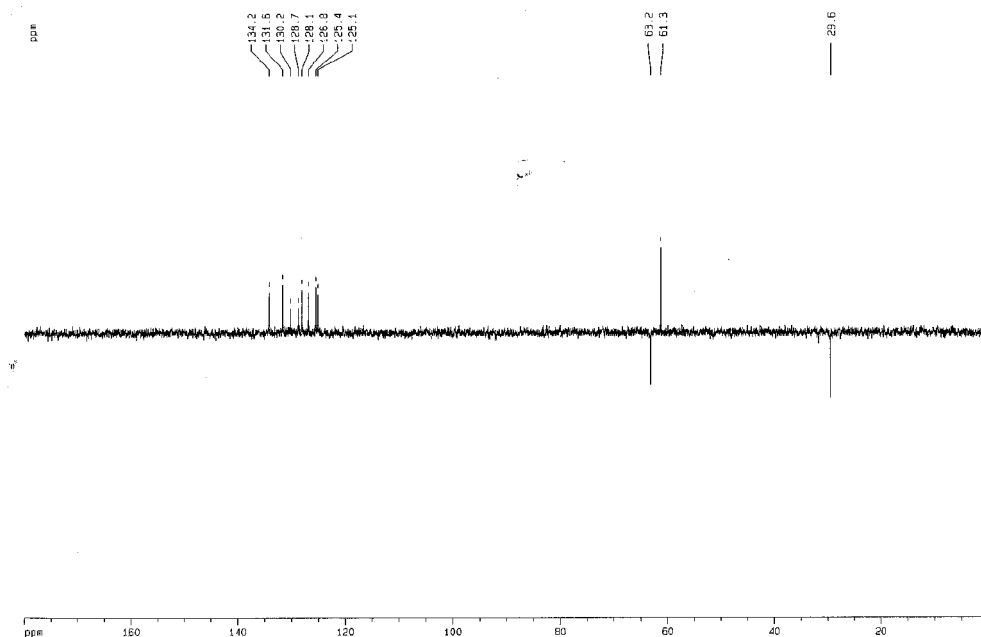

ESI mass spectrum

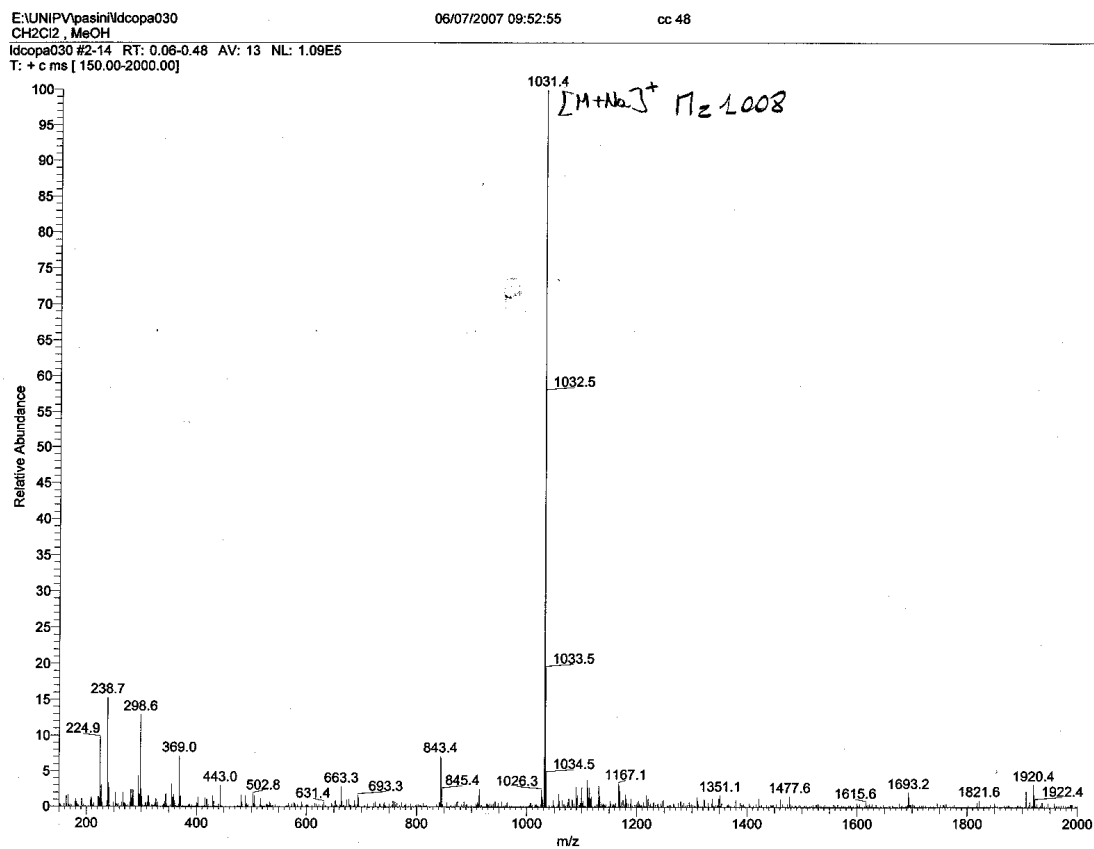

Macrocycle **3d**.

$^1\text{H}$  NMR ( $\text{CDCl}_3$ , 300 MHz)

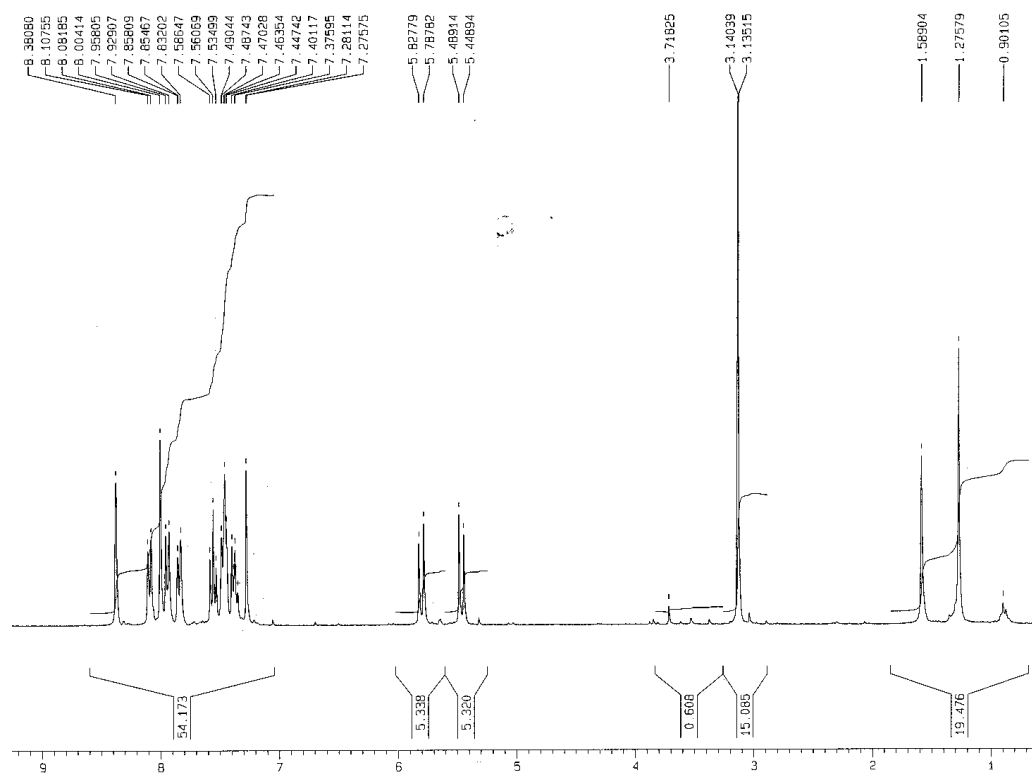

$^{13}\text{C}$  NMR ( $\text{CDCl}_3$ , 75 MHz)

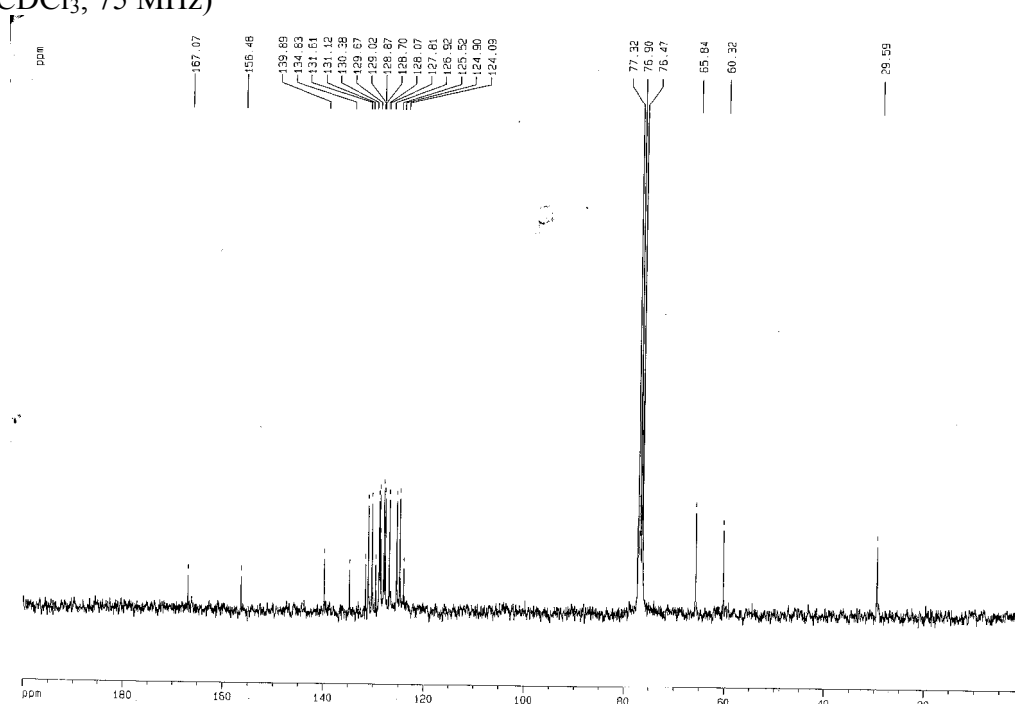

$^{13}\text{C}$  NMR DEPT ( $\text{CDCl}_3$ , 75 MHz)

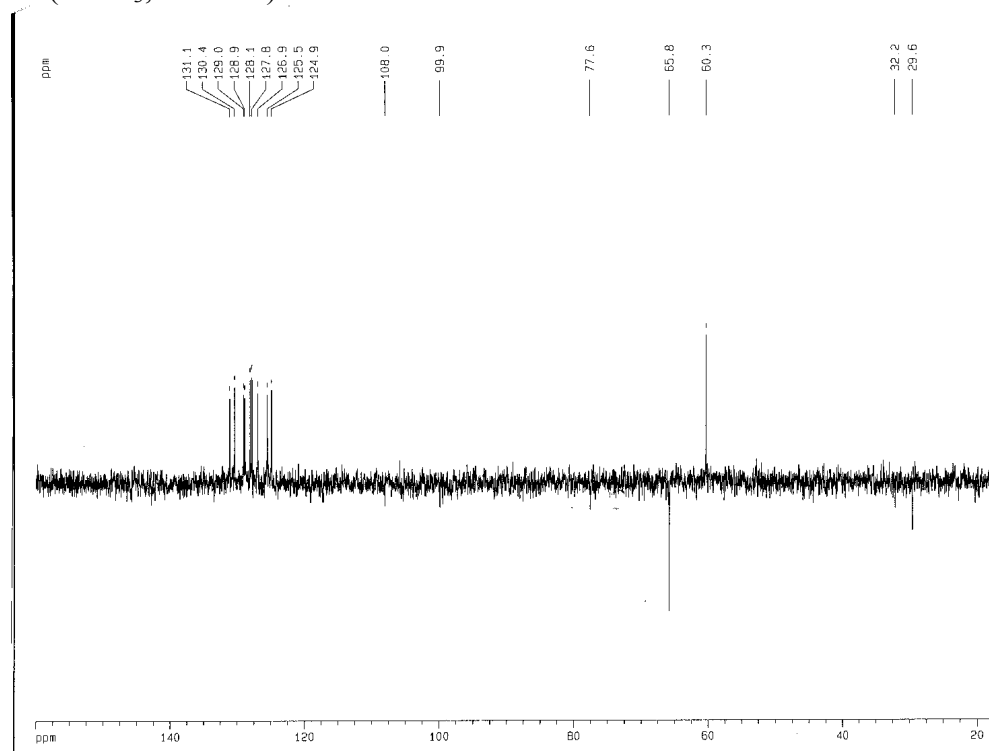

ESI mass spectrum

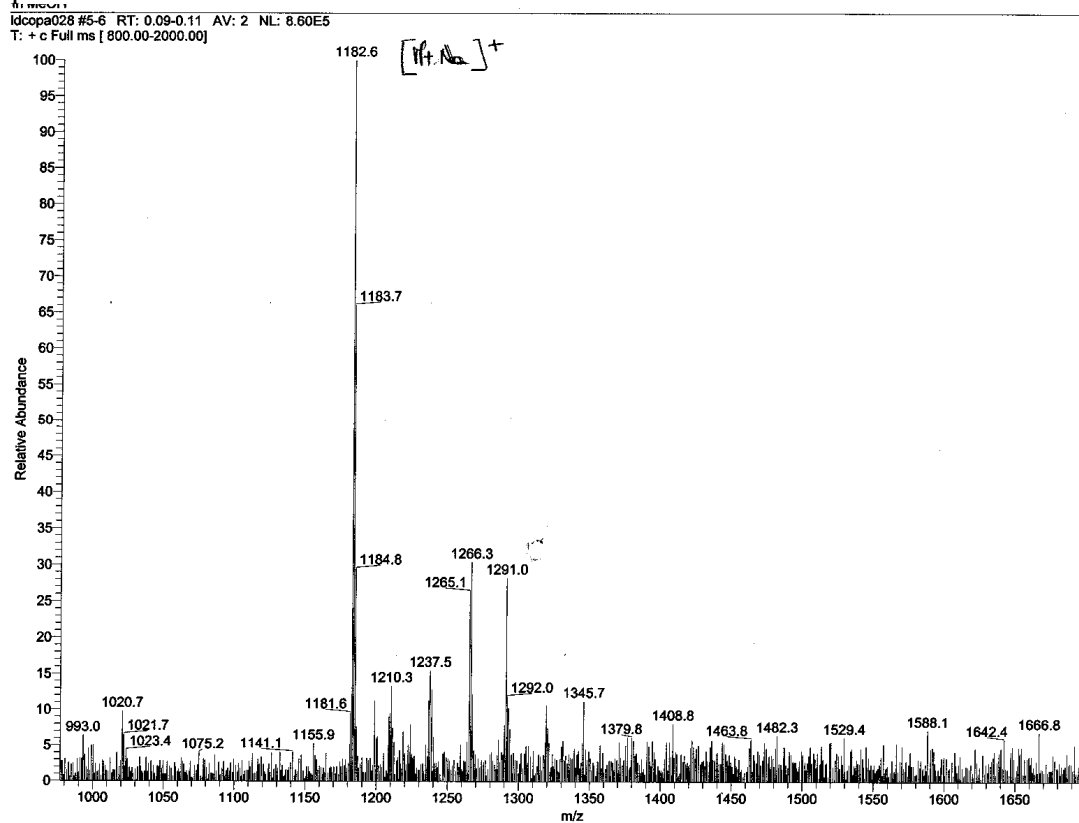

Macrocycle **4b**.

$^1\text{H}$  NMR ( $\text{CDCl}_3$ , 200 MHz)

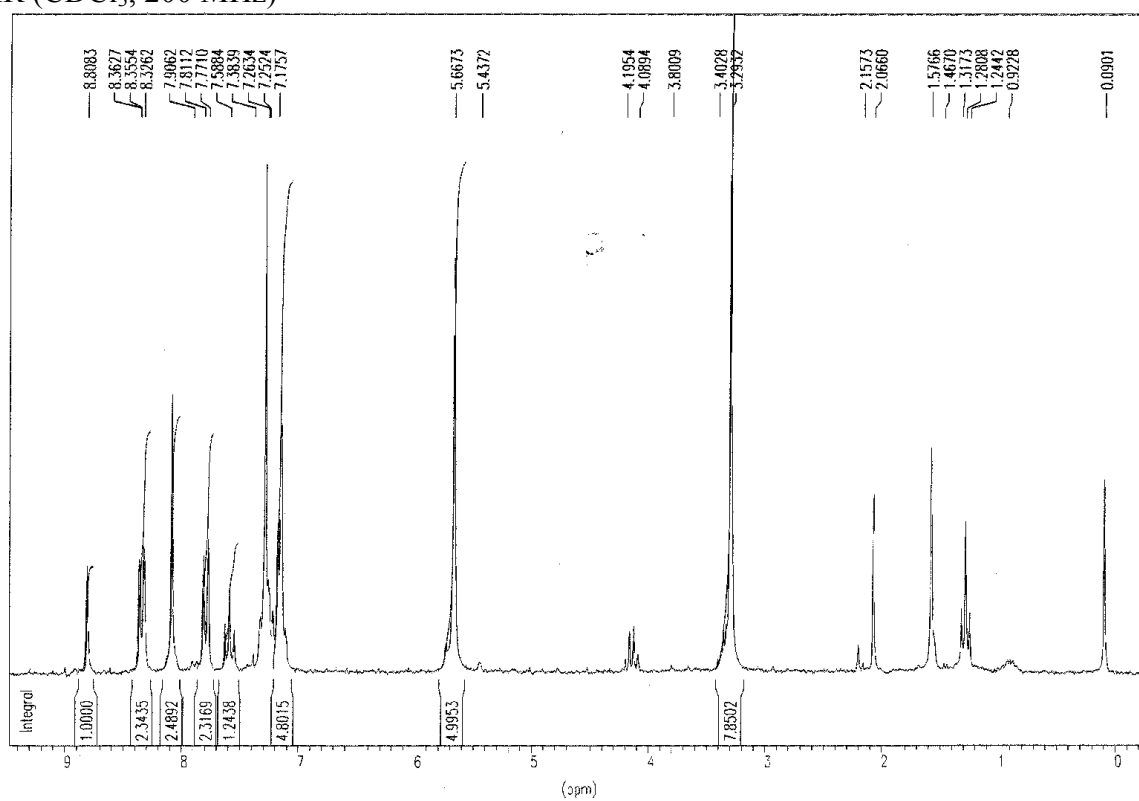

$^{13}\text{C}$  NMR ( $\text{CDCl}_3$ , 75 MHz)

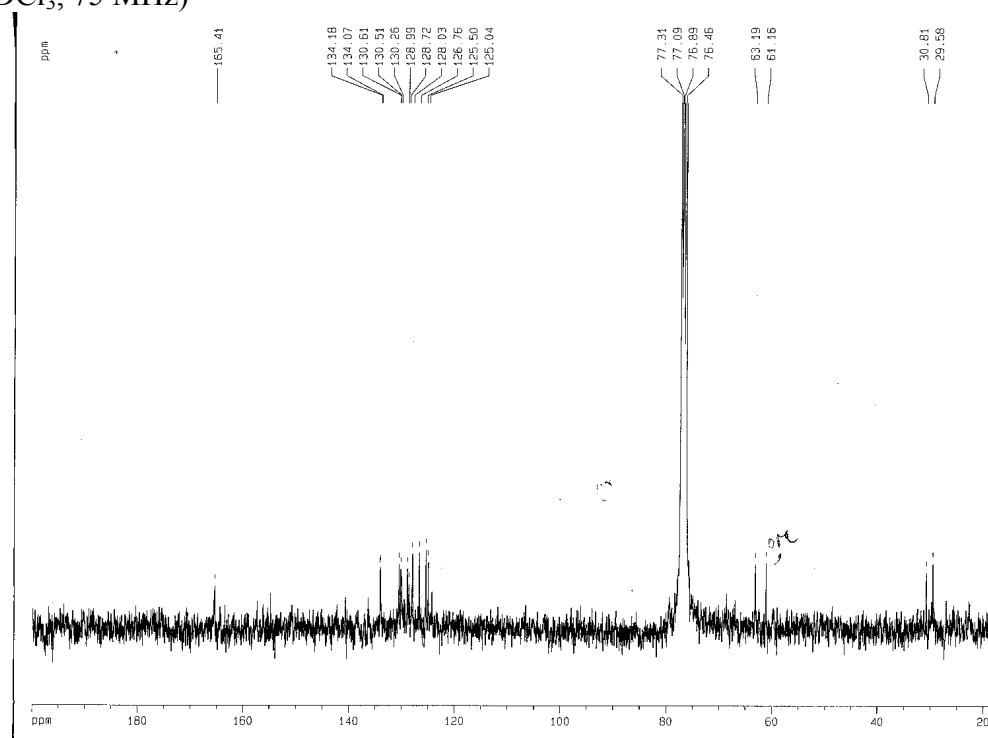



ESI mass spectrum

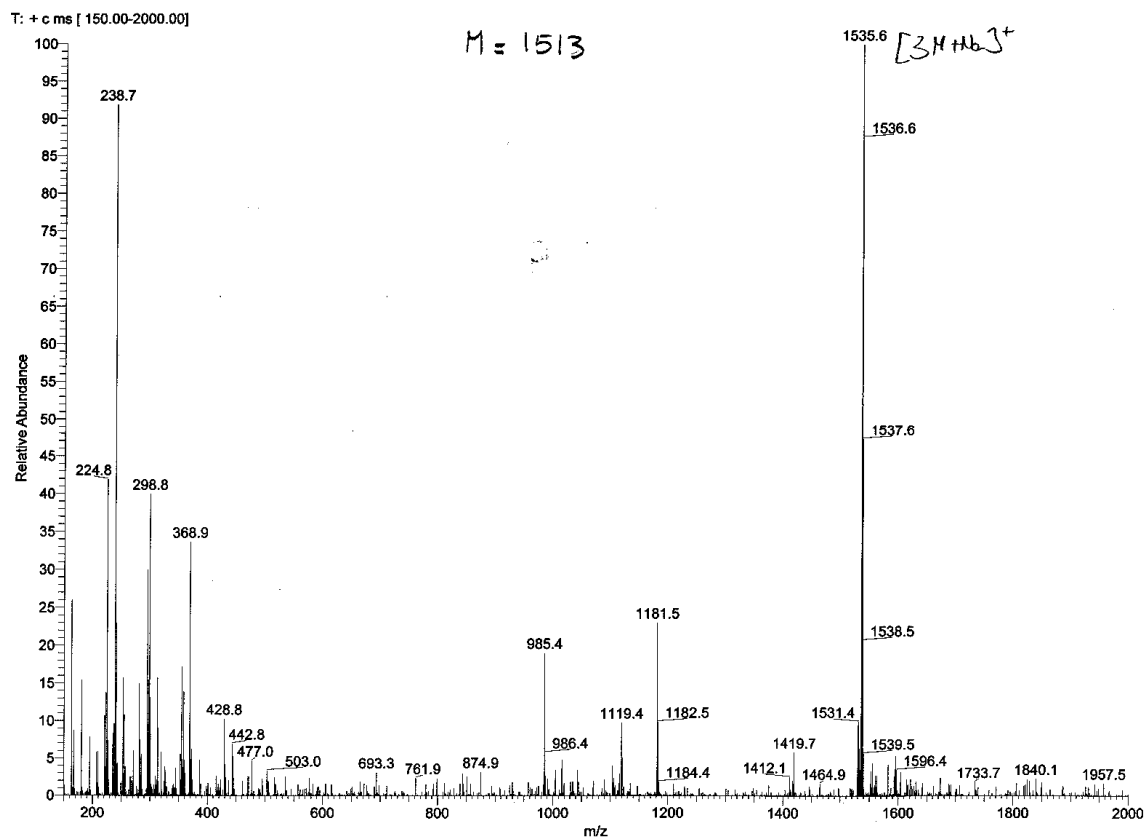

### Details on calculations.

Geometry optimizations were carried out using the semiempirical PM3 method as implemented by the Gaussian 2003 package.<sup>S1</sup>

### Atomic Coordinates and Energies for the reported molecules

Below are listed coordinates in cartesian format (units are in Å) and energies (in parentheses, units are in Hartrees) for the reported molecules. The calculated energy for C<sub>60</sub>, used in this paper, was 1.29212107 Ha.

**3b** (E = -0.33873499 Ha)

|   |           |           |           |
|---|-----------|-----------|-----------|
| C | 8.397506  | 1.016337  | 2.816303  |
| C | 7.331641  | 1.178721  | 1.973748  |
| C | 7.068042  | 0.228235  | 0.948660  |
| C | 7.915947  | -0.891987 | 0.826283  |
| C | 9.016654  | -1.038045 | 1.714087  |
| C | 9.251197  | -0.103186 | 2.685059  |
| H | 8.601001  | 1.752121  | 3.601344  |
| H | 6.666606  | 2.046426  | 2.067921  |
| C | 5.975221  | 0.377639  | 0.042130  |
| C | 7.646966  | -1.878003 | -0.159149 |
| H | 9.668486  | -1.912844 | 1.607927  |
| H | 10.098019 | -0.211504 | 3.370538  |
| C | 6.605065  | -1.729380 | -1.039159 |
| C | 5.794288  | -0.554369 | -0.967016 |
| H | 8.277937  | -2.776357 | -0.190433 |
| C | 4.995155  | 1.466328  | 0.226779  |
| C | 5.186890  | 2.739332  | -0.389213 |
| C | 3.846249  | 1.232378  | 0.963534  |
| C | 6.350707  | 3.040786  | -1.148585 |
| C | 4.190745  | 3.727598  | -0.247233 |
| C | 2.812123  | 2.215465  | 1.062488  |
| C | 6.510064  | 4.274836  | -1.717999 |
| H | 7.115380  | 2.262976  | -1.266624 |
| C | 4.381301  | 5.002234  | -0.847203 |
| C | 2.999514  | 3.439059  | 0.470141  |
| C | 5.516271  | 5.268475  | -1.563410 |
| H | 7.408371  | 4.505954  | -2.299759 |
| H | 3.602316  | 5.763912  | -0.727170 |
| H | 2.215287  | 4.217631  | 0.516095  |
| H | 5.666458  | 6.249368  | -2.025921 |
| O | 3.632176  | -0.031872 | 1.513168  |
| O | 4.721603  | -0.387451 | -1.841035 |
| C | 6.317776  | -2.813923 | -2.040649 |
| H | 6.288367  | -2.396144 | -3.069678 |
| H | 7.071478  | -3.622740 | -1.998358 |
| C | 1.541706  | 1.860746  | 1.787238  |
| H | 1.258429  | 0.802370  | 1.612855  |
| H | 1.655354  | 2.022719  | 2.875225  |
| C | -0.204245 | 2.594634  | 0.303322  |
| O | 0.465194  | 2.735002  | 1.495070  |
| C | -0.998011 | 3.807562  | -0.035046 |
| C | -2.339916 | 3.673502  | -0.381981 |
| C | -0.379689 | 5.059087  | -0.040336 |
| C | -3.069091 | 4.810118  | -0.738534 |

|   |            |           |           |
|---|------------|-----------|-----------|
| H | -2.811333  | 2.679574  | -0.383813 |
| C | -1.118086  | 6.185460  | -0.385003 |
| H | 0.690575   | 5.132284  | 0.222382  |
| C | -2.460003  | 6.065951  | -0.735782 |
| H | -0.641037  | 7.171187  | -0.387079 |
| H | -3.035984  | 6.954344  | -1.021135 |
| C | 4.033283   | -0.130734 | 2.862640  |
| H | 5.099077   | 0.098376  | 2.991857  |
| H | 3.435065   | 0.516952  | 3.514452  |
| H | 3.837117   | -1.181347 | 3.091218  |
| C | 5.118835   | -0.009204 | -3.141419 |
| H | 5.680681   | 0.932415  | -3.141444 |
| H | 5.714917   | -0.798426 | -3.626038 |
| H | 4.164363   | 0.115608  | -3.657842 |
| C | -4.479838  | 4.665027  | -1.186496 |
| O | -5.035038  | 5.271463  | -2.082485 |
| O | -5.183500  | 3.734144  | -0.474474 |
| O | -0.120144  | 1.572557  | -0.341571 |
| H | -8.433957  | 2.597463  | 0.531856  |
| C | -7.747303  | 1.749578  | 0.408893  |
| C | -8.051360  | 0.528698  | 1.066235  |
| C | -6.622654  | 1.871376  | -0.366387 |
| C | -7.169440  | -0.566228 | 0.958444  |
| C | -9.238585  | 0.400832  | 1.837817  |
| C | -5.736883  | 0.755209  | -0.492257 |
| C | -6.352166  | 3.171395  | -1.073098 |
| C | -7.503345  | -1.780025 | 1.621618  |
| C | -5.977594  | -0.431162 | 0.181434  |
| C | -9.531531  | -0.777890 | 2.467393  |
| H | -9.912214  | 1.261779  | 1.917738  |
| O | -4.555313  | 0.887243  | -1.220264 |
| H | -6.196466  | 2.981399  | -2.159788 |
| H | -7.187346  | 3.887998  | -0.962209 |
| C | -8.654677  | -1.881136 | 2.354239  |
| H | -6.823222  | -2.635909 | 1.525236  |
| C | -5.007558  | -1.544391 | 0.124831  |
| H | -10.445106 | -0.880928 | 3.061994  |
| C | -4.745761  | 0.806666  | -2.617366 |
| H | -8.909983  | -2.818504 | 2.859532  |
| C | -5.088577  | -2.498259 | -0.936226 |
| C | -3.999641  | -1.659111 | 1.068062  |
| H | -5.188843  | -0.151490 | -2.915992 |
| H | -5.368579  | 1.636776  | -2.986126 |
| H | -3.727599  | 0.893692  | -3.003833 |
| C | -6.120178  | -2.453773 | -1.914675 |
| C | -4.115312  | -3.513936 | -1.023443 |
| C | -3.019783  | -2.700536 | 0.988146  |
| O | -3.858284  | -0.672741 | 2.043997  |
| C | -6.164440  | -3.376414 | -2.924376 |
| H | -6.882555  | -1.668051 | -1.840247 |
| C | -4.179256  | -4.457498 | -2.084929 |
| C | -3.081802  | -3.590986 | -0.053477 |
| C | -1.962078  | -2.811844 | 2.055710  |
| C | -4.465589  | -0.999941 | 3.275093  |
| C | -5.181701  | -4.388722 | -3.013411 |
| H | -6.961653  | -3.340492 | -3.674164 |
| H | -3.412188  | -5.238222 | -2.144319 |
| H | -2.318623  | -4.381140 | -0.167645 |
| H | -1.671761  | -1.815865 | 2.444806  |
| H | -2.343848  | -3.418125 | 2.898645  |
| O | -0.846314  | -3.576364 | 1.628579  |

|   |           |           |           |
|---|-----------|-----------|-----------|
| H | -5.543056 | -1.180097 | 3.167620  |
| H | -3.992324 | -1.870757 | 3.744729  |
| H | -4.287532 | -0.104368 | 3.875249  |
| H | -5.234949 | -5.113775 | -3.832038 |
| C | 0.271536  | -2.933099 | 1.143053  |
| C | 1.061897  | -3.761766 | 0.192635  |
| O | 0.539418  | -1.827893 | 1.562330  |
| C | 2.443474  | -3.575258 | 0.108301  |
| C | 0.426543  | -4.693204 | -0.633033 |
| C | 3.181351  | -4.340260 | -0.794928 |
| H | 2.937981  | -2.820730 | 0.736561  |
| C | 1.174890  | -5.452126 | -1.525015 |
| H | -0.669359 | -4.817770 | -0.582151 |
| C | 2.553297  | -5.282020 | -1.608004 |
| C | 4.657142  | -4.139152 | -0.886530 |
| H | 0.676967  | -6.184572 | -2.169108 |
| H | 3.139498  | -5.880821 | -2.313796 |
| O | 5.513510  | -4.617191 | -0.172389 |
| O | 5.000027  | -3.336460 | -1.939273 |

**3c** (E = -0.34805572 Ha)

|   |           |           |           |
|---|-----------|-----------|-----------|
| C | -6.890309 | 3.007423  | 0.755079  |
| C | -6.919926 | 1.608573  | 0.926271  |
| C | -7.666205 | 3.837519  | 1.609697  |
| C | -6.086075 | 3.577360  | -0.265658 |
| C | -7.734653 | 1.064484  | 1.958091  |
| C | -6.135318 | 0.782153  | 0.063584  |
| C | -8.439749 | 3.285579  | 2.593801  |
| H | -7.629611 | 4.923736  | 1.466117  |
| C | -5.326485 | 2.787397  | -1.091318 |
| H | -6.072633 | 4.670760  | -0.378477 |
| C | -8.474047 | 1.882900  | 2.767905  |
| H | -7.761914 | -0.024797 | 2.088062  |
| C | -5.351333 | 1.368599  | -0.916532 |
| C | -6.176070 | -0.683957 | 0.237255  |
| H | -9.038559 | 3.920432  | 3.254956  |
| C | -4.503927 | 3.435651  | -2.171447 |
| H | -9.101343 | 1.459828  | 3.559505  |
| O | -4.502729 | 0.561328  | -1.672116 |
| C | -7.148797 | -1.443478 | -0.484100 |
| C | -5.289027 | -1.334717 | 1.078843  |
| H | -4.421315 | 2.784373  | -3.066915 |
| H | -4.947836 | 4.400233  | -2.486408 |
| C | -4.988229 | 0.286529  | -2.968841 |
| C | -8.080914 | -0.831739 | -1.368049 |
| C | -7.191802 | -2.842742 | -0.319259 |
| C | -5.332656 | -2.754495 | 1.242087  |
| O | -4.278427 | -0.596171 | 1.692175  |
| H | -5.992786 | -0.154345 | -2.952820 |
| H | -4.988214 | 1.195032  | -3.590132 |
| H | -4.261497 | -0.432989 | -3.352816 |
| C | -9.000820 | -1.586581 | -2.043604 |
| H | -8.050672 | 0.258027  | -1.493181 |
| C | -8.155766 | -3.606158 | -1.032913 |
| C | -6.270668 | -3.479999 | 0.552020  |
| C | -4.382068 | -3.472903 | 2.160670  |
| C | -4.527871 | -0.318605 | 3.053532  |
| C | -9.039486 | -2.989899 | -1.875997 |
| H | -9.717775 | -1.111322 | -2.721281 |
| H | -8.173869 | -4.693790 | -0.896807 |

|   |           |           |           |
|---|-----------|-----------|-----------|
| H | -6.311872 | -4.573516 | 0.655554  |
| H | -4.148944 | -2.864311 | 3.059663  |
| H | -4.801610 | -4.441204 | 2.496386  |
| O | -3.086511 | -3.626743 | 1.596695  |
| H | -5.487279 | 0.191632  | 3.204910  |
| H | -4.494403 | -1.238458 | 3.657099  |
| H | -3.698731 | 0.339601  | 3.322873  |
| H | -9.783231 | -3.573330 | -2.428452 |
| C | -2.841041 | -4.645277 | 0.718526  |
| C | -1.487237 | -4.586878 | 0.100962  |
| O | -3.686557 | -5.500597 | 0.534686  |
| C | -0.869194 | -5.782904 | -0.272851 |
| C | -0.849184 | -3.366997 | -0.130385 |
| C | 0.382083  | -5.759519 | -0.876618 |
| H | -1.376592 | -6.740080 | -0.100164 |
| C | 0.406886  | -3.343519 | -0.728404 |
| H | -1.331275 | -2.423347 | 0.154884  |
| C | 1.019092  | -4.538985 | -1.102293 |
| H | 0.861547  | -6.696630 | -1.182253 |
| H | 0.912594  | -2.385904 | -0.901210 |
| C | 2.347290  | -4.526830 | -1.776539 |
| O | 2.628958  | -5.015457 | -2.853611 |
| O | 3.308436  | -3.894008 | -1.046688 |
| H | -1.092870 | 6.765997  | -0.871200 |
| C | -0.584004 | 5.820895  | -0.645269 |
| C | 0.757341  | 5.823554  | -0.284355 |
| C | -1.286368 | 4.615273  | -0.711018 |
| C | 1.400568  | 4.621219  | 0.018509  |
| H | 1.311360  | 6.769223  | -0.240020 |
| C | -0.641789 | 3.413004  | -0.417674 |
| C | -2.730922 | 4.650570  | -1.072188 |
| C | 2.837843  | 4.661052  | 0.407616  |
| C | 0.701357  | 3.415900  | -0.053636 |
| H | -1.188411 | 2.463051  | -0.469786 |
| O | -3.523878 | 5.531758  | -0.798361 |
| O | -3.135543 | 3.575002  | -1.811293 |
| O | 3.166888  | 3.732550  | 1.354500  |
| O | 3.681540  | 5.435069  | -0.002955 |
| H | 1.203697  | 2.468149  | 0.177276  |
| C | 4.501637  | 3.647966  | 1.834317  |
| C | 5.402308  | 2.828864  | 0.950894  |
| H | 4.338604  | 3.150880  | 2.813976  |
| H | 4.931160  | 4.651447  | 2.021636  |
| C | 5.373644  | 1.399402  | 0.968331  |
| C | 6.293637  | 3.471178  | 0.129031  |
| C | 6.243199  | 0.657182  | 0.185894  |
| O | 4.392858  | 0.735496  | 1.702938  |
| C | 7.190866  | 2.738987  | -0.690996 |
| H | 6.317893  | 4.569364  | 0.088342  |
| C | 6.226712  | -0.819562 | 0.208836  |
| C | 7.174945  | 1.329755  | -0.664300 |
| C | 4.695463  | 0.615465  | 3.076283  |
| C | 8.108312  | 3.416643  | -1.539793 |
| C | 7.039030  | -1.510343 | 1.161082  |
| C | 5.439617  | -1.545035 | -0.670488 |
| C | 8.092614  | 0.621669  | -1.489575 |
| H | 5.659108  | 0.119532  | 3.247737  |
| H | 4.688431  | 1.598398  | 3.571555  |
| H | 3.876181  | -0.001947 | 3.451617  |
| C | 8.976591  | 2.708635  | -2.324846 |
| H | 8.103517  | 4.512812  | -1.554102 |

|   |          |           |           |
|---|----------|-----------|-----------|
| C | 7.869878 | -0.819220 | 2.086788  |
| C | 7.023174 | -2.919715 | 1.189454  |
| C | 5.435190 | -2.974663 | -0.647569 |
| O | 4.566643 | -0.864608 | -1.517420 |
| C | 8.969000 | 1.295129  | -2.296302 |
| H | 8.087560 | -0.475312 | -1.462306 |
| H | 9.684359 | 3.225659  | -2.980979 |
| C | 8.634687 | -1.508173 | 2.988258  |
| H | 7.889677 | 0.277691  | 2.059087  |
| C | 7.824823 | -3.613520 | 2.136754  |
| C | 6.209619 | -3.634502 | 0.272696  |
| C | 4.614242 | -3.776027 | -1.618286 |
| C | 5.032044 | -0.760126 | -2.846477 |
| H | 9.674640 | 0.745977  | -2.928503 |
| C | 8.611540 | -2.921560 | 3.016253  |
| H | 9.274284 | -0.971964 | 3.697171  |
| H | 7.799422 | -4.709233 | 2.148892  |
| H | 6.211249 | -4.731618 | 0.313487  |
| H | 4.564885 | -3.276845 | -2.611690 |
| H | 5.041935 | -4.786237 | -1.770549 |
| H | 6.021775 | -0.290154 | -2.904733 |
| H | 5.056319 | -1.745928 | -3.335460 |
| H | 4.279391 | -0.123476 | -3.317111 |
| H | 9.230472 | -3.451317 | 3.747724  |

**4b, conformation n.1** (E = -0.51647347 Ha)

|   |           |           |           |
|---|-----------|-----------|-----------|
| C | 6.268472  | 8.690380  | 3.117461  |
| C | 5.231746  | 8.523686  | 2.240237  |
| C | 5.402259  | 7.761174  | 1.050763  |
| C | 6.660588  | 7.178709  | 0.796954  |
| C | 7.722904  | 7.365721  | 1.723326  |
| C | 7.529122  | 8.105239  | 2.857725  |
| H | 6.132586  | 9.279281  | 4.030669  |
| H | 4.253476  | 8.980250  | 2.436612  |
| C | 4.339385  | 7.569656  | 0.113398  |
| C | 6.856598  | 6.402862  | -0.374720 |
| H | 8.694602  | 6.904046  | 1.512237  |
| H | 8.343480  | 8.251021  | 3.574922  |
| C | 5.838125  | 6.213354  | -1.274215 |
| C | 4.565569  | 6.816712  | -1.027617 |
| H | 7.840796  | 5.944152  | -0.546406 |
| C | 3.020608  | 8.176647  | 0.386840  |
| C | 2.789674  | 9.539015  | 0.017971  |
| C | 2.003591  | 7.453030  | 0.988428  |
| C | 3.796487  | 10.334478 | -0.597821 |
| C | 1.529135  | 10.119494 | 0.266339  |
| C | 0.723482  | 8.042125  | 1.230678  |
| C | 3.547212  | 11.635665 | -0.939532 |
| H | 4.779705  | 9.884726  | -0.785719 |
| C | 1.293711  | 11.473539 | -0.097862 |
| C | 0.503686  | 9.347478  | 0.871084  |
| C | 2.281541  | 12.213380 | -0.687744 |
| H | 4.326350  | 12.244248 | -1.410444 |
| H | 0.308471  | 11.910516 | 0.101680  |
| H | -0.474800 | 9.814556  | 1.043460  |
| H | 2.105006  | 13.256468 | -0.969834 |
| O | 2.162487  | 6.098878  | 1.275089  |
| O | 3.527012  | 6.540959  | -1.915437 |
| C | 6.086136  | 5.375814  | -2.499091 |
| H | 5.438511  | 5.670171  | -3.345123 |

|   |           |            |           |
|---|-----------|------------|-----------|
| H | 7.140771  | 5.456724   | -2.828198 |
| C | -0.391723 | 7.259074   | 1.865374  |
| H | -0.012070 | 6.513769   | 2.591522  |
| H | -1.096978 | 7.923357   | 2.401905  |
| O | 5.682327  | 4.023937   | -2.313212 |
| C | 6.551778  | 3.115771   | -1.778697 |
| O | 7.692558  | 3.446202   | -1.514905 |
| C | 5.955145  | 1.764141   | -1.597089 |
| C | 5.058005  | 1.238337   | -2.528820 |
| C | 6.321804  | 1.016591   | -0.476600 |
| C | 4.530957  | -0.034275  | -2.338709 |
| H | 4.765099  | 1.824944   | -3.407424 |
| C | 5.788574  | -0.259987  | -0.296476 |
| H | 7.024874  | 1.430780   | 0.258365  |
| C | 4.891648  | -0.787990  | -1.226925 |
| H | 3.826139  | -0.446497  | -3.068867 |
| H | 4.473872  | -1.792492  | -1.084090 |
| C | 6.174674  | -1.038696  | 0.911820  |
| O | 6.278148  | -0.626532  | 2.051234  |
| O | 6.446537  | -2.346205  | 0.638369  |
| H | 10.292686 | -6.309559  | -0.013898 |
| C | 9.401194  | -6.929163  | -0.164889 |
| C | 8.133515  | -6.410053  | 0.215861  |
| C | 9.501540  | -8.179404  | -0.710786 |
| C | 6.974912  | -7.191492  | 0.029805  |
| C | 8.025656  | -5.109854  | 0.773806  |
| C | 8.342500  | -8.966635  | -0.900317 |
| H | 10.475571 | -8.583462  | -1.005373 |
| C | 5.702557  | -6.664339  | 0.415586  |
| C | 7.112046  | -8.487737  | -0.541605 |
| C | 6.807750  | -4.603939  | 1.150702  |
| H | 8.938354  | -4.511884  | 0.895368  |
| H | 8.442822  | -9.965957  | -1.336765 |
| C | 4.489769  | -7.480570  | 0.202796  |
| C | 5.632099  | -5.398466  | 0.974334  |
| H | 6.211030  | -9.098475  | -0.681162 |
| C | 6.736355  | -3.220065  | 1.733314  |
| C | 4.122611  | -8.453610  | 1.184213  |
| C | 3.700417  | -7.319582  | -0.924643 |
| O | 4.402448  | -4.818349  | 1.279048  |
| H | 5.954936  | -3.143996  | 2.514852  |
| H | 7.700142  | -2.921723  | 2.189860  |
| C | 4.892272  | -8.665264  | 2.362419  |
| C | 2.962924  | -9.230331  | 0.986806  |
| C | 2.516796  | -8.098621  | -1.115170 |
| O | 3.983694  | -6.320208  | -1.854158 |
| C | 4.515755  | -9.604899  | 3.282976  |
| H | 5.797247  | -8.063691  | 2.514588  |
| C | 2.591590  | -10.200571 | 1.957597  |
| C | 2.169891  | -9.033903  | -0.173244 |
| C | 1.644094  | -7.917541  | -2.327147 |
| C | 3.352197  | -10.382111 | 3.080014  |
| H | 5.112203  | -9.765041  | 4.187312  |
| H | 1.685526  | -10.794668 | 1.790207  |
| H | 1.261942  | -9.640230  | -0.301910 |
| H | 2.208187  | -7.530411  | -3.195358 |
| H | 1.173009  | -8.875650  | -2.622598 |
| O | 0.688935  | -6.878225  | -2.145480 |
| H | 3.069778  | -11.126927 | 3.831214  |
| C | -0.533289 | -7.156636  | -1.602241 |
| O | -0.823757 | -8.303514  | -1.317095 |

|   |            |           |           |
|---|------------|-----------|-----------|
| C | -1.399094  | -5.956987 | -1.438716 |
| C | -1.324613  | -4.879575 | -2.324215 |
| C | -2.310445  | -5.932024 | -0.380969 |
| C | -2.160817  | -3.782256 | -2.150606 |
| H | -0.608973  | -4.892120 | -3.154780 |
| C | -3.148014  | -4.828249 | -0.218674 |
| H | -2.368008  | -6.776850 | 0.318637  |
| C | -3.074339  | -3.750175 | -1.102507 |
| H | -2.100374  | -2.936591 | -2.844222 |
| C | -4.106877  | -4.812843 | 0.919523  |
| H | -3.734198  | -2.883058 | -0.973897 |
| O | -3.894197  | -5.153744 | 2.067333  |
| O | -5.347376  | -4.373646 | 0.563692  |
| H | -9.906122  | -1.121220 | 2.467196  |
| C | -9.987000  | -0.028552 | 2.407212  |
| C | -10.587020 | 0.682874  | 3.410303  |
| C | -9.460031  | 0.633397  | 1.263307  |
| C | -10.692323 | 2.090373  | 3.327652  |
| H | -10.992140 | 0.169273  | 4.288509  |
| C | -9.568423  | 2.036657  | 1.184518  |
| C | -8.827127  | -0.079458 | 0.198374  |
| C | -10.195158 | 2.754338  | 2.239777  |
| H | -11.174386 | 2.638537  | 4.143677  |
| C | -9.048678  | 2.723287  | 0.056694  |
| C | -8.322488  | 0.619443  | -0.886053 |
| C | -8.718903  | -1.550245 | 0.279571  |
| H | -10.268060 | 3.845672  | 2.165600  |
| C | -8.434866  | 2.042590  | -0.964336 |
| H | -9.136839  | 3.818358  | 0.018189  |
| O | -7.609285  | -0.076460 | -1.860821 |
| C | -9.765259  | -2.357997 | -0.264609 |
| C | -7.621836  | -2.159281 | 0.866278  |
| C | -7.908575  | 2.812305  | -2.144969 |
| C | -10.912945 | -1.788991 | -0.884043 |
| C | -9.664390  | -3.762154 | -0.189006 |
| C | -7.522785  | -3.583639 | 0.942399  |
| O | -6.556987  | -1.367864 | 1.292596  |
| H | -7.941293  | 2.206884  | -3.074996 |
| H | -8.499248  | 3.733802  | -2.314892 |
| O | -6.515590  | 3.078287  | -2.037532 |
| C | -11.899045 | -2.588241 | -1.394962 |
| H | -10.993848 | -0.695920 | -0.938566 |
| C | -10.701556 | -4.571797 | -0.727570 |
| C | -8.528546  | -4.356284 | 0.419723  |
| C | -6.341661  | -4.256088 | 1.584549  |
| C | -6.082774  | 4.200329  | -1.387846 |
| C | -11.793355 | -3.995982 | -1.317275 |
| H | -12.781744 | -2.145866 | -1.868530 |
| H | -10.608784 | -5.661990 | -0.662238 |
| H | -8.466884  | -5.451629 | 0.461484  |
| H | -5.963109  | -3.665290 | 2.448588  |
| H | -6.600617  | -5.266677 | 1.955234  |
| O | -6.891259  | 5.002078  | -0.958871 |
| C | -4.600538  | 4.306083  | -1.304198 |
| H | -12.594598 | -4.615313 | -1.733417 |
| C | -3.776889  | 3.807075  | -2.315507 |
| C | -4.039624  | 4.934881  | -0.190665 |
| C | -2.396569  | 3.939107  | -2.211605 |
| H | -4.211692  | 3.309425  | -3.190292 |
| C | -2.653819  | 5.066165  | -0.098585 |
| H | -4.685740  | 5.323997  | 0.607844  |



|   |           |           |           |
|---|-----------|-----------|-----------|
| C | -1.829002 | 4.567493  | -1.108345 |
| H | -1.750885 | 3.545603  | -3.004129 |
| C | -2.071220 | 5.728944  | 1.100173  |
| H | -0.739319 | 4.671692  | -1.034318 |
| O | -2.398039 | 5.570850  | 2.260666  |
| O | -1.080072 | 6.612352  | 0.790654  |
| C | -6.522606 | -1.169770 | 2.690334  |
| H | -7.460322 | -0.748760 | 3.073771  |
| H | -6.290699 | -2.108682 | 3.215849  |
| H | -5.705169 | -0.455612 | 2.813485  |
| C | -8.348615 | -0.317230 | -3.038788 |
| H | -9.298104 | -0.829278 | -2.838716 |
| H | -8.536796 | 0.620554  | -3.583340 |
| H | -7.682330 | -0.961577 | -3.616819 |
| C | 2.795463  | 5.850398  | 2.512788  |
| H | 2.174222  | 6.172776  | 3.356754  |
| H | 2.898974  | 4.762644  | 2.514366  |
| H | 3.781241  | 6.329386  | 2.578688  |
| C | 3.317322  | 7.556955  | -2.873025 |
| H | 3.120127  | 8.532289  | -2.408699 |
| H | 4.165455  | 7.645178  | -3.562344 |
| H | 2.432505  | 7.204028  | -3.408079 |
| C | 3.900583  | -5.184598 | 2.547228  |
| H | 4.525612  | -4.792457 | 3.358238  |
| H | 2.918310  | -4.706283 | 2.563049  |
| H | 3.798921  | -6.272498 | 2.655375  |
| C | 4.934780  | -6.703768 | -2.824531 |
| H | 5.881545  | -7.029178 | -2.373431 |
| H | 4.550044  | -7.495780 | -3.477949 |
| H | 5.081118  | -5.783280 | -3.394649 |

**4b, conformation n.2** (E = -0.52240409 Ha)

|   |            |           |           |
|---|------------|-----------|-----------|
| C | -10.039369 | -3.551714 | 3.273138  |
| C | -9.196534  | -3.998154 | 2.291956  |
| C | -8.898658  | -3.181405 | 1.165943  |
| C | -9.489230  | -1.904117 | 1.081243  |
| C | -10.362409 | -1.462497 | 2.112712  |
| C | -10.629996 | -2.270185 | 3.183909  |
| H | -10.263397 | -4.182089 | 4.140131  |
| H | -8.731683  | -4.989526 | 2.361238  |
| C | -8.025788  | -3.618211 | 0.121491  |
| C | -9.206975  | -1.067450 | -0.029059 |
| H | -10.811232 | -0.465456 | 2.034089  |
| H | -11.299559 | -1.934011 | 3.982368  |
| C | -8.359071  | -1.477677 | -1.027169 |
| C | -7.763756  | -2.774741 | -0.946600 |
| H | -9.676191  | -0.074295 | -0.074519 |
| C | -7.435120  | -4.970115 | 0.198941  |
| C | -8.118204  | -6.053984 | -0.437884 |
| C | -6.254255  | -5.216005 | 0.880177  |
| C | -9.346605  | -5.868143 | -1.132066 |
| C | -7.570941  | -7.351396 | -0.373417 |
| C | -5.709211  | -6.536623 | 0.954223  |
| C | -9.977220  | -6.923637 | -1.732628 |
| H | -9.785109  | -4.862624 | -1.168029 |
| C | -8.241756  | -8.431901 | -1.008812 |
| C | -6.358752  | -7.570911 | 0.330490  |
| C | -9.417797  | -8.220638 | -1.674794 |
| H | -10.924097 | -6.775220 | -2.262335 |
| H | -7.800308  | -9.433665 | -0.953586 |

|   |           |           |           |
|---|-----------|-----------|-----------|
| H | -5.950727 | -8.589455 | 0.370227  |
| H | -9.938668 | -9.049504 | -2.165130 |
| O | -5.636163 | -4.220019 | 1.633065  |
| O | -6.824850 | -3.171384 | -1.899892 |
| C | -8.090808 | -0.552002 | -2.182270 |
| H | -7.780003 | -1.103182 | -3.093925 |
| H | -8.994578 | 0.037205  | -2.434123 |
| C | -4.444058 | -6.822003 | 1.714931  |
| H | -4.377256 | -6.222675 | 2.643283  |
| H | -4.367959 | -7.890367 | 1.995366  |
| O | -6.950916 | 0.267560  | -1.946281 |
| C | -7.102333 | 1.496210  | -1.365934 |
| O | -8.218162 | 1.911367  | -1.114260 |
| C | -5.819794 | 2.211073  | -1.120755 |
| C | -4.676541 | 1.950201  | -1.879164 |
| C | -5.783666 | 3.177236  | -0.111631 |
| C | -3.502027 | 2.651834  | -1.627193 |
| H | -4.696158 | 1.195038  | -2.673951 |
| C | -4.603737 | 3.880433  | 0.126532  |
| H | -6.680121 | 3.383572  | 0.489351  |
| C | -3.458948 | 3.617609  | -0.628547 |
| H | -2.606076 | 2.444527  | -2.222193 |
| H | -2.529122 | 4.179807  | -0.432762 |
| C | -4.571307 | 4.907883  | 1.203709  |
| O | -5.038938 | 4.826108  | 2.321854  |
| O | -3.937898 | 6.050063  | 0.811481  |
| H | -4.334586 | 11.508345 | -0.435109 |
| C | -3.248637 | 11.398006 | -0.535278 |
| C | -2.630853 | 10.218441 | -0.037027 |
| C | -2.496816 | 12.376416 | -1.125786 |
| C | -1.236879 | 10.052384 | -0.163969 |
| C | -3.405901 | 9.211855  | 0.594798  |
| C | -1.096293 | 12.222275 | -1.241646 |
| H | -2.967631 | 13.287247 | -1.509876 |
| C | -0.621890 | 8.860751  | 0.335102  |
| C | -0.481353 | 11.092270 | -0.775441 |
| C | -2.816036 | 8.080693  | 1.097919  |
| H | -4.490604 | 9.359314  | 0.679867  |
| H | -0.509188 | 13.020957 | -1.707125 |
| C | 0.838177  | 8.694722  | 0.181730  |
| C | -1.402316 | 7.904725  | 0.964838  |
| H | 0.607033  | 10.975472 | -0.855309 |
| C | -3.672831 | 7.058041  | 1.791566  |
| C | 1.701365  | 9.180607  | 1.212784  |
| C | 1.387278  | 8.086063  | -0.935820 |
| O | -0.824662 | 6.818732  | 1.618058  |
| H | -3.162916 | 6.622844  | 2.672549  |
| H | -4.631048 | 7.493147  | 2.135592  |
| C | 1.196834  | 9.809261  | 2.385075  |
| C | 3.096518  | 9.038538  | 1.068603  |
| C | 2.800601  | 7.915709  | -1.065096 |
| O | 0.558071  | 7.530224  | -1.911991 |
| C | 2.049595  | 10.270468 | 3.350670  |
| H | 0.110790  | 9.911921  | 2.501930  |
| C | 3.962809  | 9.528310  | 2.084089  |
| C | 3.626415  | 8.398689  | -0.081211 |
| C | 3.405758  | 7.211416  | -2.248658 |
| C | 3.448435  | 10.130815 | 3.199316  |
| H | 1.656970  | 10.751108 | 4.252928  |
| H | 5.045251  | 9.409888  | 1.957399  |
| H | 4.716485  | 8.286676  | -0.168321 |

|   |           |           |           |
|---|-----------|-----------|-----------|
| H | 2.722330  | 7.170126  | -3.116177 |
| H | 4.338556  | 7.714427  | -2.571300 |
| O | 3.588700  | 5.823228  | -1.984945 |
| H | 4.110899  | 10.507328 | 3.985612  |
| C | 4.781568  | 5.367823  | -1.497998 |
| O | 5.710879  | 6.140754  | -1.356377 |
| C | 4.795175  | 3.908210  | -1.204932 |
| C | 3.923260  | 3.022657  | -1.842239 |
| C | 5.720883  | 3.428620  | -0.274263 |
| C | 3.974750  | 1.664468  | -1.545961 |
| H | 3.195589  | 3.389015  | -2.576194 |
| C | 5.769994  | 2.064301  | 0.008260  |
| H | 6.407554  | 4.121865  | 0.231044  |
| C | 4.894345  | 1.179045  | -0.623719 |
| H | 3.288180  | 0.972283  | -2.045149 |
| C | 6.758607  | 1.559736  | 1.000734  |
| H | 4.939142  | 0.100391  | -0.392240 |
| O | 7.049881  | 2.049413  | 2.073645  |
| O | 7.377880  | 0.419850  | 0.580765  |
| H | 8.785169  | -4.874024 | 2.415339  |
| C | 8.152548  | -5.770397 | 2.413867  |
| C | 8.205878  | -6.664897 | 3.447992  |
| C | 7.268323  | -5.980333 | 1.319443  |
| C | 7.382983  | -7.814671 | 3.445854  |
| H | 8.885434  | -6.498007 | 4.290362  |
| C | 6.449308  | -7.127795 | 1.321464  |
| C | 7.189956  | -5.068084 | 0.221709  |
| C | 6.522998  | -8.043229 | 2.406807  |
| H | 7.441856  | -8.515035 | 4.285433  |
| C | 5.556380  | -7.360523 | 0.243955  |
| C | 6.301947  | -5.319132 | -0.812454 |
| C | 8.072108  | -3.883113 | 0.208333  |
| H | 5.877334  | -8.929078 | 2.395512  |
| C | 5.468937  | -6.480689 | -0.805685 |
| H | 4.925351  | -8.260491 | 0.266026  |
| O | 6.157749  | -4.363759 | -1.819554 |
| C | 9.335713  | -3.976579 | -0.456090 |
| C | 7.715690  | -2.697210 | 0.829230  |
| C | 4.506479  | -6.773048 | -1.924317 |
| C | 9.768307  | -5.175250 | -1.089670 |
| C | 10.189984 | -2.855624 | -0.481168 |
| C | 8.589852  | -1.564893 | 0.809602  |
| O | 6.566001  | -2.609252 | 1.610993  |
| H | 4.808384  | -6.281476 | -2.872354 |
| H | 4.441309  | -7.862688 | -2.113759 |
| O | 3.233293  | -6.179557 | -1.692959 |
| C | 10.982492 | -5.235415 | -1.717816 |
| H | 9.113436  | -6.055400 | -1.056126 |
| C | 11.445018 | -2.940402 | -1.143661 |
| C | 9.794037  | -1.653086 | 0.159358  |
| C | 8.224216  | -0.279177 | 1.498184  |
| C | 2.254579  | -6.890390 | -1.055465 |
| C | 11.830445 | -4.104721 | -1.749518 |
| H | 11.311681 | -6.161649 | -2.200435 |
| H | 12.095496 | -2.058286 | -1.158166 |
| H | 10.474199 | -0.791764 | 0.127647  |
| H | 7.699298  | -0.459462 | 2.456017  |
| H | 9.117789  | 0.338337  | 1.712675  |
| O | 2.461792  | -8.048568 | -0.743435 |
| C | 0.994190  | -6.130320 | -0.832103 |
| H | 12.796268 | -4.175364 | -2.260353 |

|   |           |           |           |
|---|-----------|-----------|-----------|
| C | 0.706934  | -4.952848 | -1.526723 |
| C | 0.076647  | -6.633430 | 0.095025  |
| C | -0.490573 | -4.283829 | -1.294852 |
| H | 1.417730  | -4.547464 | -2.256775 |
| C | -1.124680 | -5.960541 | 0.311707  |
| H | 0.299234  | -7.555825 | 0.649606  |
| C | -1.411067 | -4.782275 | -0.380510 |
| H | -0.711587 | -3.359756 | -1.839814 |
| C | -2.098612 | -6.504613 | 1.297822  |
| H | -2.366211 | -4.257462 | -0.202717 |
| O | -1.867527 | -6.939769 | 2.408090  |
| O | -3.376354 | -6.492047 | 0.821893  |
| C | 5.381320  | -2.341377 | 0.893258  |
| H | 5.424779  | -1.386981 | 0.343962  |
| H | 5.130101  | -3.151997 | 0.200186  |
| H | 4.635515  | -2.280200 | 1.690163  |
| C | 6.796988  | -4.706163 | -3.030399 |
| H | 7.859199  | -4.942180 | -2.890475 |
| H | 6.285428  | -5.549981 | -3.517214 |
| H | 6.683288  | -3.799755 | -3.629481 |
| C | -4.776492 | -3.373347 | 0.901786  |
| H | -5.315973 | -2.800078 | 0.139709  |
| H | -4.393828 | -2.704943 | 1.677596  |
| H | -3.942825 | -3.919208 | 0.430793  |
| C | -7.392311 | -3.615815 | -3.113324 |
| H | -8.129240 | -4.414456 | -2.962750 |
| H | -7.851913 | -2.778544 | -3.659646 |
| H | -6.526535 | -3.994061 | -3.661747 |
| C | -0.544658 | 5.707127  | 0.796012  |
| H | 0.223456  | 5.934969  | 0.048745  |
| H | -0.166305 | 4.976302  | 1.515693  |
| H | -1.441816 | 5.311050  | 0.293536  |
| C | 0.222362  | 8.424695  | -2.951371 |
| H | -0.306066 | 9.311070  | -2.576838 |
| H | 1.103838  | 8.738812  | -3.522829 |
| H | -0.439614 | 7.823743  | -3.579499 |

**4c, conformation n.1** (E = -0.52843019 Ha)

|   |            |           |           |
|---|------------|-----------|-----------|
| C | -10.311014 | 0.591573  | 2.283194  |
| C | -9.367627  | -0.338595 | 1.941066  |
| C | -8.872723  | -0.413053 | 0.609230  |
| C | -9.373650  | 0.489475  | -0.351070 |
| C | -10.351325 | 1.449087  | 0.029471  |
| C | -10.808148 | 1.497448  | 1.318060  |
| H | -10.691900 | 0.643911  | 3.308531  |
| H | -8.981159  | -1.045754 | 2.685907  |
| C | -7.887206  | -1.370891 | 0.219752  |
| C | -8.897101  | 0.437168  | -1.686855 |
| H | -10.727901 | 2.147715  | -0.726705 |
| H | -11.560917 | 2.234622  | 1.615857  |
| C | -7.960565  | -0.490671 | -2.067315 |
| C | -7.452623  | -1.407615 | -1.095485 |
| H | -9.285842  | 1.163617  | -2.413846 |
| C | -7.321586  | -2.291290 | 1.226538  |
| C | -7.913077  | -3.576661 | 1.424507  |
| C | -6.203051  | -1.934985 | 1.961688  |
| C | -9.077046  | -3.988275 | 0.717689  |
| C | -7.332305  | -4.467288 | 2.350487  |
| C | -5.595227  | -2.852375 | 2.874358  |
| C | -9.624836  | -5.223153 | 0.935664  |

|   |            |           |           |
|---|------------|-----------|-----------|
| H | -9.529568  | -3.292859 | -0.000393 |
| C | -7.918708  | -5.745631 | 2.558076  |
| C | -6.160365  | -4.088899 | 3.056592  |
| C | -9.039911  | -6.113136 | 1.865536  |
| H | -10.522925 | -5.535146 | 0.392335  |
| H | -7.454495  | -6.428907 | 3.278740  |
| H | -5.701954  | -4.813135 | 3.743986  |
| H | -9.494946  | -7.096612 | 2.022054  |
| O | -5.609676  | -0.696834 | 1.717895  |
| O | -6.427747  | -2.286710 | -1.442263 |
| C | -7.512765  | -0.536959 | -3.502154 |
| H | -7.450909  | -1.586298 | -3.861759 |
| H | -8.207459  | 0.020776  | -4.159568 |
| C | -4.341539  | -2.494540 | 3.626110  |
| O | -6.169485  | -0.114768 | -3.694517 |
| C | -5.873579  | 1.216340  | -3.765944 |
| O | -6.751502  | 2.050466  | -3.677517 |
| C | -4.418352  | 1.462448  | -3.981360 |
| C | -3.830823  | 1.132949  | -5.202813 |
| C | -3.660081  | 2.045019  | -2.967366 |
| C | -2.481859  | 1.396154  | -5.415297 |
| H | -4.428378  | 0.669412  | -5.995670 |
| C | -2.309526  | 2.303300  | -3.177580 |
| H | -4.113828  | 2.304064  | -1.996155 |
| C | -1.723022  | 1.981257  | -4.401988 |
| H | -2.018782  | 1.149598  | -6.377725 |
| H | -1.714778  | 2.763612  | -2.368326 |
| C | -0.288778  | 2.307577  | -4.638698 |
| O | 0.169489   | 2.973320  | -5.544496 |
| O | 0.554205   | 1.739273  | -3.717353 |
| O | 8.172602   | -0.730926 | 4.446093  |
| C | 7.009361   | -0.996295 | 4.216199  |
| C | 5.825751   | -0.128794 | 4.474114  |
| O | 6.671451   | -2.210665 | 3.686433  |
| C | 4.963671   | 0.192714  | 3.424936  |
| C | 5.610611   | 0.388805  | 5.751259  |
| C | 3.893545   | 1.051839  | 3.650251  |
| H | 5.126699   | -0.227646 | 2.424032  |
| C | 4.533018   | 1.237973  | 5.979362  |
| H | 6.291898   | 0.133688  | 6.571054  |
| C | 3.684306   | 1.574986  | 4.925876  |
| H | 3.222888   | 1.318767  | 2.822007  |
| H | 4.356201   | 1.642437  | 6.982226  |
| C | 2.539347   | 2.500506  | 5.162276  |
| O | 2.753185   | 3.725362  | 4.593618  |
| O | 1.525657   | 2.280086  | 5.791953  |
| C | 1.703565   | 4.681640  | 4.539949  |
| C | 0.781064   | 4.451673  | 3.374023  |
| H | 2.281857   | 5.620897  | 4.414420  |
| H | 1.146798   | 4.738105  | 5.495325  |
| C | -0.508292  | 4.048707  | 3.613843  |
| C | 1.215430   | 4.634714  | 2.023881  |
| C | -1.403986  | 3.784811  | 2.545001  |
| H | -0.859917  | 3.898522  | 4.643965  |
| C | 0.363073   | 4.388047  | 0.959601  |
| O | 2.548602   | 4.940703  | 1.752748  |
| C | -0.970591  | 3.937592  | 1.211987  |
| C | -2.724442  | 3.328454  | 2.807657  |
| C | 0.810856   | 4.545070  | -0.438387 |
| C | -1.871710  | 3.609299  | 0.161557  |
| C | -3.567775  | 3.018567  | 1.775737  |

|   |           |           |           |
|---|-----------|-----------|-----------|
| H | -3.046710 | 3.214672  | 3.849135  |
| C | 0.818585  | 5.841790  | -1.039123 |
| C | 1.201789  | 3.446464  | -1.186187 |
| C | -3.134158 | 3.159160  | 0.438512  |
| H | -1.531378 | 3.684351  | -0.885291 |
| H | -4.578877 | 2.632300  | 1.973782  |
| C | 0.371991  | 6.999968  | -0.343735 |
| C | 1.272680  | 5.984408  | -2.366656 |
| C | 1.568905  | 3.583150  | -2.560577 |
| O | 1.113103  | 2.160922  | -0.655123 |
| H | -3.814000 | 2.884598  | -0.384001 |
| C | 0.414887  | 8.231508  | -0.938757 |
| H | -0.018102 | 6.883950  | 0.675567  |
| C | 1.320182  | 7.276068  | -2.959010 |
| C | 1.635251  | 4.835574  | -3.116847 |
| C | 1.795411  | 2.374133  | -3.426847 |
| C | 0.904016  | 8.374350  | -2.257579 |
| H | 0.067436  | 9.119670  | -0.400561 |
| H | 1.688396  | 7.372409  | -3.987053 |
| H | 1.934354  | 4.962919  | -4.166395 |
| H | 0.937198  | 9.370948  | -2.709821 |
| O | -2.739557 | -4.546525 | 2.872470  |
| C | -2.557708 | -3.476083 | 2.327788  |
| C | -1.632489 | -3.183582 | 1.197586  |
| O | -3.221196 | -2.361570 | 2.763044  |
| C | -0.290661 | -3.553666 | 1.286809  |
| C | -2.121609 | -2.564910 | 0.046152  |
| C | 0.568019  | -3.300241 | 0.222285  |
| H | 0.086713  | -4.044400 | 2.191328  |
| C | -1.265754 | -2.322620 | -1.022648 |
| H | -3.176032 | -2.267036 | -0.017392 |
| C | 0.076383  | -2.689493 | -0.930742 |
| H | 1.626014  | -3.578031 | 0.292859  |
| H | -1.647520 | -1.843268 | -1.931438 |
| C | 0.979332  | -2.439460 | -2.090369 |
| O | 1.899591  | -1.465732 | -1.829688 |
| O | 0.945708  | -2.984686 | -3.175650 |
| C | 2.839245  | -1.086272 | -2.827970 |
| C | 4.079675  | -1.935629 | -2.777210 |
| H | 3.025173  | -0.025587 | -2.546211 |
| H | 2.394270  | -1.089209 | -3.842904 |
| C | 4.219612  | -2.969098 | -3.669312 |
| C | 5.103285  | -1.709874 | -1.806411 |
| C | 5.354909  | -3.819510 | -3.629643 |
| H | 3.439463  | -3.163575 | -4.418990 |
| C | 6.205990  | -2.544892 | -1.718769 |
| O | 4.911821  | -0.693308 | -0.871809 |
| C | 6.347241  | -3.621324 | -2.647926 |
| C | 5.491301  | -4.884352 | -4.562019 |
| C | 7.219660  | -2.352585 | -0.662126 |
| C | 7.460582  | -4.506860 | -2.613508 |
| C | 6.575326  | -5.716963 | -4.507268 |
| H | 4.711406  | -5.025695 | -5.319462 |
| C | 8.420085  | -1.633302 | -0.952784 |
| C | 7.011852  | -2.839566 | 0.618205  |
| C | 7.569933  | -5.525279 | -3.520636 |
| H | 8.232491  | -4.350729 | -1.849408 |
| H | 6.684544  | -6.538573 | -5.222726 |
| C | 8.695324  | -1.119228 | -2.250717 |
| C | 9.363909  | -1.421560 | 0.073190  |
| C | 7.947620  | -2.582049 | 1.667553  |

|   |           |           |           |
|---|-----------|-----------|-----------|
| O | 5.826217  | -3.496251 | 0.944412  |
| H | 8.429855  | -6.202740 | -3.492563 |
| C | 9.857358  | -0.441357 | -2.500542 |
| H | 7.960288  | -1.286047 | -3.048324 |
| C | 10.564707 | -0.715494 | -0.211378 |
| C | 9.100447  | -1.894302 | 1.385364  |
| C | 7.671663  | -3.020760 | 3.080351  |
| C | 10.804359 | -0.237495 | -1.470596 |
| H | 10.066938 | -0.050649 | -3.501881 |
| H | 11.289619 | -0.559856 | 0.596150  |
| H | 9.830043  | -1.683355 | 2.179531  |
| H | 7.190013  | -4.014664 | 3.119310  |
| H | 8.599915  | -3.059829 | 3.682998  |
| H | 11.727618 | 0.306901  | -1.694422 |
| H | 2.333780  | 1.554135  | -2.901253 |
| H | 2.359601  | 2.626337  | -4.345345 |
| H | -4.408452 | -1.468749 | 4.046146  |
| H | -4.144658 | -3.202325 | 4.454213  |
| C | 2.892010  | 6.291106  | 1.973703  |
| H | 2.300178  | 6.973091  | 1.350609  |
| H | 2.787264  | 6.570253  | 3.032971  |
| H | 3.943564  | 6.321158  | 1.678739  |
| C | 2.263313  | 1.757725  | 0.055847  |
| H | 3.145424  | 1.699779  | -0.596267 |
| H | 2.477199  | 2.413674  | 0.908865  |
| H | 1.989968  | 0.757732  | 0.404319  |
| C | -5.861511 | 0.251994  | 2.732171  |
| H | -6.935077 | 0.419993  | 2.882770  |
| H | -5.391749 | -0.043932 | 3.682701  |
| H | -5.383015 | 1.160339  | 2.342237  |
| C | -6.878948 | -3.436792 | -2.125363 |
| H | -7.622240 | -3.997166 | -1.544441 |
| H | -7.294076 | -3.177890 | -3.111504 |
| H | -5.964533 | -4.022796 | -2.242615 |
| C | 5.583100  | 0.505593  | -1.198408 |
| H | 5.108356  | 1.006943  | -2.051029 |
| H | 5.456489  | 1.105361  | -0.292447 |
| H | 6.649577  | 0.349189  | -1.407680 |
| C | 5.851796  | -4.877447 | 0.651959  |
| H | 6.569775  | -5.411420 | 1.285503  |
| H | 4.832709  | -5.191689 | 0.889951  |
| H | 6.076711  | -5.074346 | -0.404675 |

**4c, conformation n.2** (E = -0.51285032 Ha)

|   |           |           |           |
|---|-----------|-----------|-----------|
| C | 8.845122  | -8.169038 | -1.906192 |
| C | 7.728968  | -7.764964 | -1.225514 |
| C | 7.755940  | -6.591575 | -0.421684 |
| C | 8.954537  | -5.853792 | -0.340776 |
| C | 10.101400 | -6.294011 | -1.056488 |
| C | 10.045556 | -7.426825 | -1.821376 |
| H | 8.819580  | -9.071243 | -2.526336 |
| H | 6.794100  | -8.335124 | -1.293624 |
| C | 6.609390  | -6.143496 | 0.304843  |
| C | 9.007933  | -4.676856 | 0.449682  |
| H | 11.025263 | -5.708304 | -0.985640 |
| H | 10.925235 | -7.769108 | -2.376185 |
| C | 7.906855  | -4.238893 | 1.141740  |
| C | 6.692474  | -4.989151 | 1.066855  |
| H | 9.949886  | -4.111785 | 0.492517  |
| C | 5.359531  | -6.927745 | 0.232007  |

|   |          |            |           |
|---|----------|------------|-----------|
| C | 5.121976 | -7.940054  | 1.213406  |
| C | 4.423775 | -6.711494  | -0.766347 |
| C | 6.052742 | -8.217859  | 2.253412  |
| C | 3.934551 | -8.696716  | 1.150666  |
| C | 3.220471 | -7.482901  | -0.829819 |
| C | 5.796939 | -9.193970  | 3.177530  |
| H | 6.985048 | -7.640277  | 2.294444  |
| C | 3.689278 | -9.703896  | 2.123864  |
| C | 2.997352 | -8.454362  | 0.113701  |
| C | 4.600480 | -9.944634  | 3.115277  |
| H | 6.517911 | -9.406249  | 3.973936  |
| H | 2.759854 | -10.281795 | 2.063283  |
| H | 2.084248 | -9.062493  | 0.079315  |
| H | 4.416504 | -10.719468 | 3.866628  |
| O | 4.703073 | -5.830199  | -1.808816 |
| O | 5.538204 | -4.507705  | 1.685620  |
| C | 8.013740 | -2.987428  | 1.969250  |
| H | 7.319809 | -3.005904  | 2.835406  |
| H | 9.042309 | -2.854348  | 2.358322  |
| C | 2.221088 | -7.277350  | -1.933537 |
| H | 2.444936 | -6.393192  | -2.560676 |
| H | 2.194373 | -8.164866  | -2.595267 |
| O | 7.549595 | -1.839984  | 1.266684  |
| C | 8.413852 | -1.119135  | 0.491851  |
| O | 9.589718 | -1.426161  | 0.443248  |
| C | 8.210749 | 0.347616   | -1.500618 |
| C | 7.768208 | 0.021239   | -0.217036 |
| C | 7.648289 | 1.424208   | -2.176059 |
| C | 6.757616 | 0.771087   | 0.385882  |
| C | 6.646455 | 2.182936   | -1.567291 |
| H | 7.989604 | 1.675598   | -3.187972 |
| C | 6.197794 | 1.851169   | -0.288160 |
| H | 6.400487 | 0.514507   | 1.390160  |
| H | 5.406752 | 2.439405   | 0.192063  |
| C | 6.071776 | 3.336461   | -2.314280 |
| O | 5.893115 | 3.416685   | -3.514147 |
| O | 5.747080 | 4.391410   | -1.513024 |
| H | 7.828051 | 7.769243   | 1.565717  |
| C | 6.845885 | 8.232190   | 1.715763  |
| C | 5.773633 | 7.856560   | 0.860825  |
| C | 6.650950 | 9.156931   | 2.704663  |
| C | 4.501127 | 8.435079   | 1.041381  |
| C | 5.978332 | 6.913752   | -0.179013 |
| C | 5.379632 | 9.749770   | 2.881768  |
| H | 7.473632 | 9.450312   | 3.364902  |
| C | 3.427095 | 8.048577   | 0.179895  |
| C | 4.332018 | 9.399750   | 2.074204  |
| C | 4.953082 | 6.547054   | -1.014523 |
| H | 6.979104 | 6.481613   | -0.307485 |
| H | 5.245149 | 10.495410  | 3.672429  |
| C | 2.096403 | 8.660227   | 0.375227  |
| C | 3.658876 | 7.128051   | -0.829500 |
| H | 3.346758 | 9.865717   | 2.203110  |
| C | 5.225377 | 5.575683   | -2.128927 |
| C | 1.791507 | 9.881847   | -0.302281 |
| C | 1.142381 | 8.079779   | 1.195531  |
| O | 2.666583 | 6.862110   | -1.770248 |
| H | 4.321274 | 5.323306   | -2.715479 |
| H | 5.975921 | 5.993679   | -2.827617 |
| C | 2.726973 | 10.521494  | -1.162454 |
| C | 0.527638 | 10.477608  | -0.115350 |



|   |            |           |           |
|---|------------|-----------|-----------|
| C | -0.148547  | 8.670961  | 1.361023  |
| O | 1.388867   | 6.844962  | 1.797696  |
| C | 2.407356   | 11.693920 | -1.791350 |
| H | 3.707507   | 10.053640 | -1.315301 |
| C | 0.219619   | 11.697763 | -0.777047 |
| C | -0.431601  | 9.851687  | 0.721593  |
| C | -1.206417  | 8.028618  | 2.215983  |
| C | 1.140706   | 12.291082 | -1.596098 |
| H | 3.129356   | 12.181509 | -2.454807 |
| H | -0.767216  | 12.148754 | -0.620849 |
| H | -1.415788  | 10.325990 | 0.843181  |
| H | -0.781783  | 7.346870  | 2.975289  |
| H | -1.808678  | 8.795474  | 2.741699  |
| O | -2.011442  | 7.123270  | 1.466470  |
| H | 0.907940   | 13.229600 | -2.109718 |
| C | -3.149321  | 7.563896  | 0.853458  |
| O | -3.507753  | 8.718761  | 0.984407  |
| C | -4.416177  | 6.843146  | -1.156914 |
| C | -3.849474  | 6.504757  | 0.073417  |
| C | -5.100704  | 5.883038  | -1.892628 |
| C | -3.964261  | 5.203592  | 0.563567  |
| C | -5.228038  | 4.584489  | -1.395476 |
| H | -5.537864  | 6.144963  | -2.864045 |
| C | -4.654664  | 4.244295  | -0.169684 |
| H | -3.512927  | 4.932091  | 1.525031  |
| C | -5.976198  | 3.580735  | -2.202634 |
| H | -4.747981  | 3.224209  | 0.221434  |
| O | -5.975813  | 3.465243  | -3.412756 |
| O | -6.738370  | 2.740864  | -1.445042 |
| H | -10.656372 | -1.829949 | -1.478151 |
| C | -10.568934 | -2.915288 | -1.343689 |
| C | -11.396693 | -3.771063 | -2.018008 |
| C | -9.573388  | -3.416049 | -0.459225 |
| C | -11.277429 | -5.169424 | -1.846287 |
| H | -12.159751 | -3.381495 | -2.700045 |
| C | -9.454094  | -4.811139 | -0.295716 |
| C | -8.697075  | -2.549058 | 0.265192  |
| C | -10.327793 | -5.680385 | -1.004636 |
| H | -11.951358 | -5.834350 | -2.396277 |
| C | -8.457864  | -5.338911 | 0.565326  |
| C | -7.741588  | -3.094992 | 1.107137  |
| C | -8.836229  | -1.088153 | 0.093794  |
| H | -10.222718 | -6.762711 | -0.866214 |
| C | -7.604676  | -4.510667 | 1.250275  |
| H | -8.373327  | -6.430029 | 0.668653  |
| O | -6.820930  | -2.270589 | 1.755781  |
| C | -9.742381  | -0.373789 | 0.938560  |
| C | -8.124798  | -0.403167 | -0.878188 |
| C | -6.545758  | -5.115484 | 2.130878  |
| C | -10.523725 | -1.027423 | 1.932663  |
| C | -9.880673  | 1.020035  | 0.780936  |
| C | -8.274099  | 1.009948  | -1.042067 |
| O | -7.358487  | -1.108011 | -1.803574 |
| H | -6.198436  | -4.419079 | 2.915759  |
| H | -6.921026  | -6.032120 | 2.626991  |
| O | -5.332758  | -5.339200 | 1.418165  |
| C | -11.382314 | -0.316269 | 2.725896  |
| H | -10.431749 | -2.115447 | 2.043208  |
| C | -10.775287 | 1.738596  | 1.620628  |
| C | -9.136208  | 1.693202  | -0.221317 |
| C | -7.539435  | 1.760731  | -2.117291 |

|   |            |           |           |
|---|------------|-----------|-----------|
| C | -5.115472  | -6.533271 | 0.792286  |
| C | -11.507580 | 1.083691  | 2.572406  |
| H | -11.984009 | -0.824580 | 3.486683  |
| H | -10.867226 | 2.822907  | 1.489097  |
| H | -9.264448  | 2.777505  | -0.333585 |
| H | -6.891409  | 1.111500  | -2.736504 |
| H | -8.257666  | 2.264156  | -2.793410 |
| O | -5.934471  | -7.428270 | 0.879780  |
| C | -3.778623  | -7.244555 | -1.175808 |
| H | -12.198560 | 1.632275  | 3.220788  |
| C | -3.821047  | -6.589086 | 0.056265  |
| C | -2.578890  | -7.337049 | -1.871354 |
| C | -2.662404  | -6.022369 | 0.588243  |
| C | -1.416431  | -6.781828 | -1.332675 |
| H | -2.546340  | -7.843404 | -2.843994 |
| C | -1.460615  | -6.119829 | -0.105034 |
| H | -2.693186  | -5.499551 | 1.551363  |
| C | -0.144757  | -6.905505 | -2.098503 |
| H | -0.551437  | -5.677427 | 0.319202  |
| O | -0.009053  | -6.862453 | -3.305795 |
| O | 0.945768   | -7.103241 | -1.303603 |
| C | -5.993156  | -1.222771 | -1.461708 |
| H | -5.517204  | -0.247080 | -1.310066 |
| H | -5.849096  | -1.845115 | -0.571806 |
| H | -5.571771  | -1.716020 | -2.341437 |
| C | -7.255795  | -1.816200 | 3.019729  |
| H | -8.189900  | -1.243205 | 2.952861  |
| H | -7.383617  | -2.641851 | 3.729840  |
| H | -6.434136  | -1.169919 | 3.337598  |
| C | 4.272854   | -4.504953 | -1.578989 |
| H | 4.823203   | -4.036694 | -0.755397 |
| H | 4.513572   | -4.012421 | -2.524584 |
| H | 3.195946   | -4.445071 | -1.384011 |
| C | 5.485084   | -4.763128 | 3.072692  |
| H | 5.607264   | -5.828186 | 3.305928  |
| H | 6.242165   | -4.172303 | 3.609992  |
| H | 4.481927   | -4.425708 | 3.343178  |
| C | 1.859525   | 5.743828  | -1.466394 |
| H | 1.238266   | 5.921655  | -0.581829 |
| H | 1.233268   | 5.657376  | -2.358100 |
| H | 2.447265   | 4.829317  | -1.326185 |
| C | 1.997728   | 6.942699  | 3.067672  |
| H | 2.964343   | 7.461303  | 3.022523  |
| H | 1.348271   | 7.443021  | 3.795809  |
| H | 2.139529   | 5.895783  | 3.346436  |
| H | 9.006340   | -0.241115 | -1.973798 |
| H | -4.689636  | -7.691528 | -1.592267 |
| H | -4.326759  | 7.866937  | -1.540270 |

C60@4b (E = 0.76812553 Ha)

|   |            |           |           |
|---|------------|-----------|-----------|
| C | -10.166373 | -4.443189 | 1.972135  |
| C | -9.278330  | -4.807411 | 0.996902  |
| C | -9.116702  | -4.011285 | -0.171201 |
| C | -9.890313  | -2.840352 | -0.303605 |
| C | -10.805579 | -2.481765 | 0.723597  |
| C | -10.938708 | -3.266774 | 1.836042  |
| H | -10.288348 | -5.059434 | 2.869093  |
| H | -8.679741  | -5.721465 | 1.098269  |
| C | -8.197497  | -4.362433 | -1.207838 |
| C | -9.748822  | -2.026707 | -1.457523 |

|   |            |            |           |
|---|------------|------------|-----------|
| H | -11.396855 | -1.565889  | 0.607799  |
| H | -11.640953 | -2.994224  | 2.630617  |
| C | -8.863425  | -2.358045  | -2.451958 |
| C | -8.074848  | -3.543116  | -2.318160 |
| H | -10.357232 | -1.114718  | -1.538637 |
| C | -7.391936  | -5.592804  | -1.070635 |
| C | -7.904984  | -6.823340  | -1.586577 |
| C | -6.149662  | -5.575054  | -0.458196 |
| C | -9.171969  | -6.901951  | -2.229411 |
| C | -7.138310  | -7.999455  | -1.458166 |
| C | -5.375401  | -6.769981  | -0.327337 |
| C | -9.636936  | -8.094664  | -2.712620 |
| H | -9.771321  | -5.987587  | -2.324578 |
| C | -7.642246  | -9.226857  | -1.968870 |
| C | -5.869929  | -7.949230  | -0.823857 |
| C | -8.864093  | -9.271394  | -2.582422 |
| H | -10.613781 | -8.150855  | -3.204303 |
| H | -7.034359  | -10.132723 | -1.862648 |
| H | -5.286706  | -8.875621  | -0.740266 |
| H | -9.256410  | -10.214236 | -2.977250 |
| O | -5.609544  | -4.353882  | -0.059248 |
| O | -7.094167  | -3.836131  | -3.264460 |
| C | -8.758318  | -1.472360  | -3.663472 |
| H | -8.473237  | -2.049473  | -4.568050 |
| H | -9.721047  | -0.964978  | -3.870077 |
| C | -4.031581  | -6.765957  | 0.346077  |
| H | -4.006556  | -6.039361  | 1.188907  |
| H | -3.777876  | -7.763490  | 0.753971  |
| O | -7.675768  | -0.554849  | -3.569016 |
| C | -7.861014  | 0.661081   | -2.972811 |
| O | -8.965842  | 0.977712   | -2.573186 |
| C | -6.624756  | 1.487178   | -2.905298 |
| C | -5.633795  | 1.397065   | -3.885233 |
| C | -6.477014  | 2.378470   | -1.840390 |
| C | -4.500296  | 2.197848   | -3.798771 |
| H | -5.742412  | 0.697132   | -4.722119 |
| C | -5.338262  | 3.180889   | -1.765956 |
| H | -7.253317  | 2.447833   | -1.066310 |
| C | -4.346562  | 3.091595   | -2.744457 |
| H | -3.722550  | 2.125272   | -4.566732 |
| H | -3.451738  | 3.723794   | -2.684840 |
| C | -5.191323  | 4.118447   | -0.619444 |
| O | -5.437124  | 3.896241   | 0.550626  |
| O | -4.743895  | 5.350576   | -0.993968 |
| H | -5.790314  | 10.759201  | -1.934030 |
| C | -4.707427  | 10.777391  | -2.102760 |
| C | -3.930424  | 9.661297   | -1.688308 |
| C | -4.109860  | 11.852793  | -2.700959 |
| C | -2.536798  | 9.663677   | -1.900981 |
| C | -4.547032  | 8.546475   | -1.063018 |
| C | -2.711707  | 11.862807  | -2.910441 |
| H | -4.704015  | 12.714860  | -3.021298 |
| C | -1.761200  | 8.537346   | -1.482133 |
| C | -1.944265  | 10.798239  | -2.523031 |
| C | -3.803931  | 7.471532   | -0.646833 |
| H | -5.635207  | 8.560262   | -0.917790 |
| H | -2.250468  | 12.735017  | -3.385545 |
| C | -0.303324  | 8.535818   | -1.720447 |
| C | -2.389631  | 7.471738   | -0.859567 |
| H | -0.857820  | 10.805336  | -2.677802 |
| C | -4.495385  | 6.319601   | 0.027471  |

|   |           |           |           |
|---|-----------|-----------|-----------|
| C | 0.559606  | 9.118703  | -0.741147 |
| C | 0.242955  | 7.978759  | -2.865602 |
| O | -1.641941 | 6.344363  | -0.522774 |
| H | -3.864555 | 5.898193  | 0.842248  |
| H | -5.460981 | 6.626806  | 0.473296  |
| C | 0.059859  | 9.682734  | 0.465885  |
| C | 1.950578  | 9.134612  | -0.968922 |
| C | 1.654850  | 7.989969  | -3.090929 |
| O | -0.566365 | 7.300513  | -3.775872 |
| C | 0.911688  | 10.233749 | 1.383965  |
| H | -1.022648 | 9.669561  | 0.644764  |
| C | 2.815926  | 9.714452  | -0.001072 |
| C | 2.478375  | 8.566447  | -2.156929 |
| C | 2.259150  | 7.393347  | -4.332857 |
| C | 2.305835  | 10.251388 | 1.149047  |
| H | 0.522456  | 10.667205 | 2.311205  |
| H | 3.895288  | 9.718641  | -0.193125 |
| H | 3.565976  | 8.588865  | -2.315286 |
| H | 1.527683  | 7.300866  | -5.156393 |
| H | 3.104257  | 8.012465  | -4.693225 |
| O | 2.620640  | 6.029481  | -4.143211 |
| H | 2.967965  | 10.697483 | 1.898295  |
| C | 3.885347  | 5.702176  | -3.744227 |
| O | 4.712899  | 6.578024  | -3.572048 |
| C | 4.100244  | 4.238491  | -3.579911 |
| C | 3.375463  | 3.305737  | -4.325324 |
| C | 5.063717  | 3.806180  | -2.665970 |
| C | 3.615160  | 1.946790  | -4.154440 |
| H | 2.616074  | 3.637001  | -5.043631 |
| C | 5.299841  | 2.440393  | -2.505015 |
| H | 5.633161  | 4.537728  | -2.076192 |
| C | 4.574105  | 1.507368  | -3.248229 |
| H | 3.044262  | 1.215929  | -4.737446 |
| C | 6.319390  | 1.999927  | -1.514713 |
| H | 4.757890  | 0.433051  | -3.120479 |
| O | 6.542117  | 2.487962  | -0.422856 |
| O | 7.063154  | 0.940889  | -1.943532 |
| H | 9.166311  | -4.174269 | 0.069698  |
| C | 8.589705  | -5.101990 | 0.174366  |
| C | 8.803419  | -5.940426 | 1.234417  |
| C | 7.619504  | -5.418635 | -0.817049 |
| C | 8.061943  | -7.137344 | 1.363235  |
| H | 9.551629  | -5.693120 | 1.994808  |
| C | 6.886944  | -6.616050 | -0.687802 |
| C | 7.367666  | -4.562601 | -1.933478 |
| C | 7.124972  | -7.470154 | 0.423665  |
| H | 8.247806  | -7.790755 | 2.221895  |
| C | 5.920412  | -6.962452 | -1.667233 |
| C | 6.403929  | -4.918530 | -2.863121 |
| C | 8.143389  | -3.313661 | -2.075569 |
| H | 6.542864  | -8.394836 | 0.513085  |
| C | 5.675518  | -6.142656 | -2.739933 |
| H | 5.362811  | -7.902622 | -1.550005 |
| O | 6.079591  | -4.016381 | -3.875104 |
| C | 9.360805  | -3.333912 | -2.825441 |
| C | 7.713288  | -2.126713 | -1.506147 |
| C | 4.667223  | -6.569501 | -3.771587 |
| C | 9.856519  | -4.524309 | -3.427102 |
| C | 10.099905 | -2.142967 | -2.976138 |
| C | 8.465764  | -0.920238 | -1.660519 |
| O | 6.477973  | -2.091010 | -0.861313 |

|   |           |           |           |
|---|-----------|-----------|-----------|
| H | 4.900455  | -6.146451 | -4.771230 |
| H | 4.642226  | -7.673028 | -3.865896 |
| O | 3.378482  | -6.017667 | -3.532480 |
| C | 11.025587 | -4.513100 | -4.138111 |
| H | 9.285894  | -5.453567 | -3.303526 |
| C | 11.310842 | -2.155653 | -3.720872 |
| C | 9.629324  | -0.941119 | -2.386307 |
| C | 8.013485  | 0.371839  | -1.039564 |
| C | 2.474081  | -6.698681 | -2.766738 |
| C | 11.761711 | -3.315560 | -4.288961 |
| H | 11.404523 | -5.432485 | -4.596686 |
| H | 11.873350 | -1.221370 | -3.830924 |
| H | 10.215672 | -0.023149 | -2.523925 |
| H | 7.565875  | 0.193334  | -0.035906 |
| H | 8.853401  | 1.081662  | -0.913129 |
| O | 2.778435  | -7.779410 | -2.296114 |
| C | 1.163744  | -6.008447 | -2.618820 |
| H | 12.693807 | -3.330410 | -4.863180 |
| C | 0.748744  | -5.018284 | -3.513032 |
| C | 0.330586  | -6.386855 | -1.562763 |
| C | -0.493885 | -4.415247 | -3.352415 |
| H | 1.394999  | -4.709316 | -4.343358 |
| C | -0.917256 | -5.781420 | -1.415959 |
| H | 0.655863  | -7.159146 | -0.852080 |
| C | -1.332939 | -4.793452 | -2.310014 |
| H | -0.815997 | -3.637640 | -4.053548 |
| C | -1.790915 | -6.193831 | -0.283611 |
| H | -2.315953 | -4.320216 | -2.194000 |
| O | -1.467506 | -6.351163 | 0.877987  |
| O | -3.080521 | -6.418502 | -0.663675 |
| C | 6.577484  | -2.109341 | 0.547284  |
| H | 7.092966  | -3.006519 | 0.911617  |
| H | 7.083938  | -1.207197 | 0.923667  |
| H | 5.530293  | -2.110578 | 0.868104  |
| C | 6.657036  | -4.331623 | -5.123866 |
| H | 7.746727  | -4.445298 | -5.063814 |
| H | 6.208327  | -5.244070 | -5.544987 |
| H | 6.397197  | -3.466087 | -5.737533 |
| C | -5.706626 | -4.118741 | 1.329770  |
| H | -5.063680 | -4.812290 | 1.892956  |
| H | -5.336497 | -3.095640 | 1.428545  |
| H | -6.739756 | -4.189179 | 1.692163  |
| C | -7.598994 | -4.447838 | -4.432005 |
| H | -8.182105 | -5.350772 | -4.211832 |
| H | -8.209738 | -3.740678 | -5.013633 |
| H | -6.691884 | -4.704831 | -4.983683 |
| C | -1.321529 | 6.278161  | 0.851302  |
| H | -2.227818 | 6.153810  | 1.464005  |
| H | -0.699609 | 5.379402  | 0.918650  |
| H | -0.761266 | 7.159470  | 1.186967  |
| C | -1.139590 | 8.135042  | -4.759601 |
| H | -1.745772 | 8.938177  | -4.320158 |
| H | -0.379256 | 8.570964  | -5.418658 |
| H | -1.772900 | 7.444095  | -5.321133 |
| C | -0.694995 | -2.067199 | 6.175698  |
| C | -1.807473 | -1.744375 | 5.291076  |
| C | -0.211560 | -1.114628 | 7.055588  |
| C | 0.232397  | -2.918277 | 5.440919  |
| C | -2.380259 | -0.485181 | 5.330813  |
| C | -1.567497 | -2.395947 | 4.009559  |
| C | -0.814746 | 0.211530  | 7.097386  |

|   |           |           |          |
|---|-----------|-----------|----------|
| C | 1.225115  | -0.962196 | 7.247181 |
| C | 1.596677  | -2.773645 | 5.622996 |
| C | -0.306904 | -3.121635 | 4.102147 |
| C | -1.870969 | 0.518061  | 6.257348 |
| C | -2.743683 | 0.189756  | 4.091165 |
| C | -1.912480 | -1.755034 | 2.832447 |
| C | 0.249183  | 1.183585  | 7.314886 |
| C | 1.509885  | 0.458194  | 7.407349 |
| C | 2.105745  | -1.770085 | 6.549187 |
| C | 2.494326  | -2.824243 | 4.475771 |
| C | 0.545492  | -3.169092 | 3.013066 |
| C | -1.919429 | 1.812954  | 5.590103 |
| C | -2.458806 | 1.610072  | 4.251412 |
| C | -2.515589 | -0.428707 | 2.874297 |
| C | -1.014819 | -1.805577 | 1.685274 |
| C | 0.203233  | 2.413152  | 6.681276 |
| C | 2.661051  | 0.999062  | 6.861816 |
| C | 3.317995  | -1.200452 | 5.974565 |
| C | 1.982371  | -3.016730 | 3.204593 |
| C | 3.557916  | -1.851739 | 4.693035 |
| C | 0.182404  | -2.494012 | 1.773500 |
| C | -0.909176 | 2.735997  | 5.796701 |
| C | -1.960026 | 2.340093  | 3.186738 |
| C | -1.990779 | 0.340403  | 1.753010 |
| C | -1.063141 | -0.510422 | 1.018381 |
| C | 1.415530  | 2.982755  | 6.106858 |
| C | 2.612672  | 2.293923  | 6.194644 |
| C | 3.588478  | 0.148245  | 6.126820 |
| C | 2.507235  | -2.247457 | 2.083263 |
| C | 4.056561  | -1.121669 | 3.628327 |
| C | 1.394761  | -1.924518 | 1.198682 |
| C | -0.384276 | 3.504810  | 4.675334 |
| C | -0.896314 | 3.312328  | 3.404117 |
| C | -1.720089 | 1.689060  | 1.905209 |
| C | 0.087878  | 0.030409  | 0.472557 |
| C | 1.052401  | 3.657494  | 4.867076 |
| C | 3.510416  | 2.243544  | 5.047534 |
| C | 4.113380  | 0.917285  | 5.005674 |
| C | 3.519524  | -1.325811 | 2.288231 |
| C | 4.340861  | 0.298748  | 3.788681 |
| C | 1.348680  | -0.695021 | 0.565265 |
| C | 0.000670  | 3.264185  | 2.255467 |
| C | -0.508139 | 2.258839  | 1.330233 |
| C | 0.372733  | 1.450749  | 0.632912 |
| C | 1.904530  | 3.609417  | 3.777760 |
| C | 3.165460  | 2.884166  | 3.870312 |
| C | 3.468903  | -0.029574 | 1.622561 |
| C | 3.977823  | 0.973650  | 2.549101 |
| C | 2.412623  | 0.277020  | 0.782698 |
| C | 1.365361  | 3.406608  | 2.438840 |
| C | 1.809511  | 1.603258  | 0.824402 |
| C | 3.405343  | 2.232897  | 2.588717 |
| C | 2.293071  | 2.555876  | 1.704047 |

C60@2x**4b** (E = 0.2426138 Ha)

|   |          |          |          |
|---|----------|----------|----------|
| C | 2.583297 | 9.916293 | 0.271771 |
| C | 3.871542 | 9.483596 | 0.110910 |
| C | 4.595442 | 8.934778 | 1.206240 |
| C | 3.963691 | 8.861457 | 2.463909 |
| C | 2.619954 | 9.303618 | 2.602837 |

|   |          |           |           |
|---|----------|-----------|-----------|
| C | 1.945741 | 9.818616  | 1.530103  |
| H | 2.030191 | 10.338526 | -0.573892 |
| H | 4.368013 | 9.556058  | -0.865011 |
| C | 5.933938 | 8.452750  | 1.068861  |
| C | 4.670288 | 8.347110  | 3.581457  |
| H | 2.129161 | 9.203534  | 3.584695  |
| H | 0.908146 | 10.153926 | 1.632990  |
| C | 5.959309 | 7.893652  | 3.456028  |
| C | 6.588510 | 7.929380  | 2.172360  |
| H | 4.161659 | 8.315785  | 4.556201  |
| C | 6.589618 | 8.518139  | -0.253075 |
| C | 7.371775 | 9.668298  | -0.584342 |
| C | 6.463866 | 7.490359  | -1.173185 |
| C | 7.529555 | 10.758583 | 0.316370  |
| C | 8.007573 | 9.733272  | -1.840845 |
| C | 7.099931 | 7.565351  | -2.452006 |
| C | 8.286387 | 11.845279 | -0.028046 |
| H | 7.025932 | 10.713894 | 1.290418  |
| C | 8.791122 | 10.871488 | -2.175119 |
| C | 7.859193 | 8.664620  | -2.762551 |
| C | 8.927199 | 11.902971 | -1.286941 |
| H | 8.402382 | 12.683129 | 0.667426  |
| H | 9.282147 | 10.905864 | -3.154466 |
| H | 8.364925 | 8.734879  | -3.734538 |
| H | 9.529375 | 12.781689 | -1.539845 |
| O | 5.792552 | 6.325771  | -0.805018 |
| O | 7.838047 | 7.338203  | 1.993738  |
| C | 6.680985 | 7.394145  | 4.678185  |
| H | 7.783258 | 7.446880  | 4.559438  |
| H | 6.406497 | 7.995110  | 5.567533  |
| C | 6.940594 | 6.475084  | -3.474145 |
| H | 5.902410 | 6.073125  | -3.464242 |
| H | 7.150791 | 6.841868  | -4.497454 |
| O | 6.488918 | 5.999079  | 4.882300  |
| C | 5.455318 | 5.559426  | 5.659086  |
| O | 4.732729 | 6.363420  | 6.219740  |
| C | 5.345492 | 4.077406  | 5.733803  |
| C | 6.463264 | 3.248821  | 5.613697  |
| C | 4.081909 | 3.520893  | 5.939837  |
| C | 6.312067 | 1.869062  | 5.698030  |
| H | 7.458622 | 3.678592  | 5.449984  |
| C | 3.939529 | 2.134275  | 6.023040  |
| H | 3.200747 | 4.173940  | 6.032953  |
| C | 5.056495 | 1.305495  | 5.900195  |
| H | 7.188789 | 1.219303  | 5.601281  |
| H | 4.948858 | 0.215069  | 5.959620  |
| C | 2.573636 | 1.579534  | 6.215422  |
| O | 1.528808 | 2.095798  | 5.859538  |
| O | 2.534005 | 0.388214  | 6.874907  |
| H | 1.380164 | -1.967069 | 11.759439 |
| C | 1.495313 | -2.901452 | 11.198372 |
| C | 1.546799 | -2.846507 | 9.778610  |
| C | 1.587792 | -4.101480 | 11.848217 |
| C | 1.703413 | -4.036124 | 9.038742  |
| C | 1.426538 | -1.606648 | 9.100144  |
| C | 1.731724 | -5.298960 | 11.110426 |
| H | 1.548591 | -4.149182 | 12.941259 |
| C | 1.772287 | -3.971084 | 7.612043  |
| C | 1.788571 | -5.269590 | 9.743706  |
| C | 1.475757 | -1.543345 | 7.730562  |
| H | 1.283698 | -0.694565 | 9.694013  |

|   |           |           |            |
|---|-----------|-----------|------------|
| H | 1.794885  | -6.250992 | 11.647714  |
| C | 1.931610  | -5.225016 | 6.848029   |
| C | 1.683125  | -2.742066 | 6.978418   |
| H | 1.892835  | -6.198474 | 9.168486   |
| C | 1.251147  | -0.219931 | 7.057281   |
| C | 0.763168  | -5.913216 | 6.393911   |
| C | 3.184085  | -5.746853 | 6.569383   |
| O | 1.899765  | -2.662839 | 5.605291   |
| H | 0.728805  | -0.347808 | 6.081035   |
| H | 0.617193  | 0.440971  | 7.683912   |
| C | -0.548829 | -5.416202 | 6.632773   |
| C | 0.909632  | -7.121195 | 5.682093   |
| C | 3.328619  | -6.980560 | 5.861093   |
| O | 4.313507  | -5.000041 | 6.901408   |
| C | -1.647412 | -6.092522 | 6.175133   |
| H | -0.664943 | -4.476194 | 7.187692   |
| C | -0.245592 | -7.806611 | 5.217308   |
| C | 2.205709  | -7.641768 | 5.431690   |
| C | 4.679954  | -7.584930 | 5.594253   |
| C | -1.493727 | -7.301102 | 5.458396   |
| H | -2.657639 | -5.703346 | 6.355494   |
| H | -0.118665 | -8.740542 | 4.656932   |
| H | 2.297499  | -8.586364 | 4.877204   |
| H | 5.417144  | -7.299969 | 6.373870   |
| H | 4.621709  | -8.690817 | 5.567398   |
| O | 5.290965  | -7.046566 | 4.428333   |
| H | -2.387923 | -7.825931 | 5.087006   |
| C | 5.074047  | -7.628353 | 3.211048   |
| O | 4.399216  | -8.639251 | 3.139877   |
| C | 5.742204  | -6.930015 | 2.079029   |
| C | 6.793920  | -6.033216 | 2.284243   |
| C | 5.298126  | -7.196910 | 0.781459   |
| C | 7.395461  | -5.409775 | 1.196645   |
| H | 7.150065  | -5.811558 | 3.297510   |
| C | 5.912545  | -6.571257 | -0.303881  |
| H | 4.466452  | -7.896016 | 0.615256   |
| C | 6.962097  | -5.673703 | -0.097932  |
| H | 8.216977  | -4.703812 | 1.360365   |
| C | 5.414454  | -6.861935 | -1.675286  |
| H | 7.443912  | -5.178161 | -0.950242  |
| O | 4.260679  | -7.042076 | -2.016400  |
| O | 6.409183  | -6.938765 | -2.604770  |
| H | 7.695477  | -5.446053 | -8.138270  |
| C | 8.093115  | -4.485122 | -8.488331  |
| C | 7.698238  | -3.962826 | -9.689822  |
| C | 9.030400  | -3.794952 | -7.670038  |
| C | 8.215589  | -2.726156 | -10.139295 |
| H | 6.976559  | -4.497384 | -10.316386 |
| C | 9.545488  | -2.563703 | -8.123419  |
| C | 9.462583  | -4.311035 | -6.409190  |
| C | 9.119843  | -2.040701 | -9.375160  |
| H | 7.882824  | -2.326744 | -11.102886 |
| C | 10.484464 | -1.855631 | -7.329690  |
| C | 10.359525 | -3.583064 | -5.644148  |
| C | 8.949590  | -5.619138 | -5.953614  |
| H | 9.526664  | -1.079953 | -9.711811  |
| C | 10.890463 | -2.340552 | -6.111866  |
| H | 10.881006 | -0.902071 | -7.706545  |
| O | 10.666377 | -4.034006 | -4.361522  |
| C | 9.673818  | -6.802756 | -6.299848  |
| C | 7.791762  | -5.723379 | -5.200696  |



|   |           |            |           |
|---|-----------|------------|-----------|
| C | 11.901494 | -1.560891  | -5.315534 |
| C | 10.871465 | -6.757458  | -7.066992 |
| C | 9.193376  | -8.057203  | -5.872610 |
| C | 7.304414  | -6.998424  | -4.773332 |
| O | 7.156358  | -4.560834  | -4.768548 |
| H | 12.456688 | -2.207512  | -4.604540 |
| H | 12.641394 | -1.079545  | -5.985086 |
| O | 11.285208 | -0.634223  | -4.429136 |
| C | 11.542677 | -7.907199  | -7.383039 |
| H | 11.243242 | -5.782012  | -7.405663 |
| C | 9.908461  | -9.238053  | -6.212312 |
| C | 8.001871  | -8.131740  | -5.105770 |
| C | 6.039252  | -7.130435  | -3.972443 |
| C | 11.037783 | 0.644665   | -4.842638 |
| C | 11.057595 | -9.162767  | -6.950649 |
| H | 12.462462 | -7.867123  | -7.975928 |
| H | 9.522833  | -10.205797 | -5.871514 |
| H | 7.647876  | -9.118359  | -4.779144 |
| H | 5.282409  | -6.379578  | -4.292095 |
| H | 5.587192  | -8.134501  | -4.088796 |
| O | 11.391359 | 1.004368   | -5.950078 |
| C | 10.345590 | 1.478649   | -3.822793 |
| H | 11.611821 | -10.069245 | -7.214914 |
| C | 10.592824 | 1.316387   | -2.458178 |
| C | 9.445075  | 2.451474   | -4.260894 |
| C | 9.940936  | 2.128486   | -1.536633 |
| H | 11.295909 | 0.550964   | -2.109265 |
| C | 8.797260  | 3.262294   | -3.328191 |
| H | 9.246685  | 2.577533   | -5.334021 |
| C | 9.044026  | 3.102099   | -1.963402 |
| H | 10.133921 | 2.000378   | -0.465979 |
| C | 7.824821  | 4.277094   | -3.816351 |
| H | 8.534722  | 3.739772   | -1.229838 |
| O | 7.030394  | 4.151109   | -4.729077 |
| O | 7.890030  | 5.459423   | -3.140148 |
| C | 6.000234  | -4.236053  | -5.511246 |
| H | 6.223812  | -4.084638  | -6.574371 |
| H | 5.222318  | -5.006720  | -5.397979 |
| H | 5.667928  | -3.300339  | -5.049973 |
| C | 11.922552 | -4.670577  | -4.267474 |
| H | 12.034796 | -5.485410  | -4.993567 |
| H | 12.739413 | -3.943512  | -4.390904 |
| H | 11.920025 | -5.065162  | -3.248859 |
| C | 4.481190  | 6.240701   | -1.322193 |
| H | 4.486603  | 6.192969   | -2.422084 |
| H | 4.114661  | 5.294885   | -0.909595 |
| H | 3.852768  | 7.075699   | -0.988311 |
| C | 8.917893  | 8.151837   | 2.398347  |
| H | 8.899528  | 9.140074   | 1.921991  |
| H | 8.935135  | 8.263927   | 3.492978  |
| H | 9.789003  | 7.583699   | 2.064091  |
| C | 0.714041  | -2.582778  | 4.840442  |
| H | 0.158968  | -1.656876  | 5.056937  |
| H | 1.089085  | -2.563352  | 3.811883  |
| H | 0.063428  | -3.451860  | 4.998133  |
| C | 4.968309  | -5.445975  | 8.069223  |
| H | 4.294975  | -5.492358  | 8.934374  |
| H | 5.437132  | -6.428573  | 7.907985  |
| H | 5.735447  | -4.683847  | 8.223947  |
| C | 0.347739  | 2.777560   | -3.580054 |
| C | 0.824027  | 3.324539   | -2.315828 |

|   |           |            |           |
|---|-----------|------------|-----------|
| C | -0.815273 | 2.028296   | -3.615287 |
| C | 1.508584  | 2.358110   | -4.355103 |
| C | 0.113364  | 3.094734   | -1.150812 |
| C | 2.279175  | 3.243048   | -2.309652 |
| C | -1.563872 | 1.786364   | -2.388307 |
| C | -0.878911 | 0.819825   | -4.427604 |
| C | 1.448101  | 1.210863   | -5.126825 |
| C | 2.702331  | 2.645980   | -3.570071 |
| C | -1.111654 | 2.305845   | -1.188031 |
| C | 0.820348  | 2.771555   | 0.082101  |
| C | 2.951632  | 2.938967   | -1.138238 |
| C | -2.090205 | 0.428213   | -2.442356 |
| C | -1.666909 | -0.169114  | -3.702645 |
| C | 0.223398  | 0.421711   | -5.163694 |
| C | 2.577985  | 0.290527   | -5.154214 |
| C | 3.774683  | 1.771736   | -3.595871 |
| C | -1.161611 | 1.494766   | 0.021984  |
| C | 0.032279  | 1.782642   | 0.806996  |
| C | 2.202182  | 2.695119   | 0.088239  |
| C | 4.080230  | 2.016466   | -1.166262 |
| C | -2.137822 | -0.341825  | -1.293414 |
| C | -1.312967 | -1.506133  | -3.750499 |
| C | 0.596282  | -0.986381  | -5.213886 |
| C | 3.711389  | 0.563670   | -4.408677 |
| C | 2.051418  | -1.067450  | -5.207755 |
| C | 4.481481  | 1.448907   | -2.362970 |
| C | -1.661474 | 0.205307   | -0.029231 |
| C | 0.665831  | 0.766462   | 1.500692  |
| C | 2.869058  | 1.624732   | 0.818763  |
| C | 4.029676  | 1.205462   | 0.043589  |
| C | -1.764891 | -1.749864  | -1.343766 |
| C | -1.363195 | -2.317036  | -2.540559 |
| C | -0.152003 | -1.925305  | -4.525572 |
| C | 4.378801  | -0.506396  | -3.677862 |
| C | 2.685301  | -2.083652  | -4.514267 |
| C | 4.854595  | 0.040825   | -2.413492 |
| C | -0.994031 | -0.864603  | 0.701541  |
| C | 0.139217  | -0.591437  | 1.447368  |
| C | 2.120897  | 0.685402   | 1.506808  |
| C | 4.383734  | -0.131620  | -0.004087 |
| C | -1.058117 | -2.073038  | -0.110716 |
| C | -0.233406 | -3.237486  | -2.567885 |
| C | 0.515169  | -2.995197  | -3.794771 |
| C | 3.881054  | -1.797005  | -3.730662 |
| C | 1.897032  | -3.071917  | -3.788934 |
| C | 4.806911  | -0.728904  | -1.264472 |
| C | 1.268995  | -1.512879  | 1.422664  |
| C | 2.493748  | -0.722633  | 1.457163  |
| C | 3.595907  | -1.120523  | 0.720821  |
| C | 0.014651  | -2.946846  | -0.136534 |
| C | 0.437746  | -3.544007  | -1.397066 |
| C | 3.828553  | -2.606261  | -2.519070 |
| C | 2.603521  | -3.394873  | -2.555978 |
| C | 4.280552  | -2.086815  | -1.318595 |
| C | 1.208363  | -2.659116  | 0.648873  |
| C | 3.532134  | -2.328898  | -0.091490 |
| C | 1.892880  | -3.624766  | -1.391016 |
| C | 2.369120  | -3.078065  | -0.126697 |
| H | -9.018238 | -12.400263 | 0.690674  |
| C | -8.875430 | -11.569182 | -0.007923 |
| C | -8.137780 | -10.476079 | 0.357111  |

|   |            |            |           |
|---|------------|------------|-----------|
| C | -9.461622  | -11.642319 | -1.292428 |
| C | -7.945665  | -9.394673  | -0.547556 |
| H | -7.676634  | -10.418794 | 1.351309  |
| C | -9.292234  | -10.619151 | -2.184478 |
| H | -10.048892 | -12.526232 | -1.561766 |
| C | -7.182064  | -8.238563  | -0.195733 |
| C | -8.528339  | -9.474033  | -1.828842 |
| H | -9.741329  | -10.665419 | -3.183267 |
| C | -6.575052  | -8.157367  | 1.148388  |
| C | -7.026713  | -7.216680  | -1.118047 |
| C | -8.347675  | -8.412601  | -2.753154 |
| C | -5.243887  | -8.641100  | 1.340626  |
| C | -7.265706  | -7.613442  | 2.219251  |
| C | -7.609837  | -7.305009  | -2.420661 |
| O | -6.378906  | -6.045802  | -0.729155 |
| H | -8.812025  | -8.494187  | -3.744673 |
| C | -4.484752  | -9.210867  | 0.280482  |
| C | -4.655865  | -8.548414  | 2.618107  |
| C | -6.678146  | -7.549609  | 3.521361  |
| O | -8.510122  | -7.029239  | 1.988732  |
| C | -7.421631  | -6.218100  | -3.441608 |
| C | -5.047239  | -5.953819  | -1.190518 |
| H | -4.946340  | -9.295634  | -0.711433 |
| C | -3.206047  | -9.648809  | 0.494352  |
| C | -3.321205  | -8.997341  | 2.812470  |
| C | -5.396527  | -8.006119  | 3.699900  |
| C | -7.435066  | -7.012310  | 4.705435  |
| C | -9.599370  | -7.837833  | 2.378161  |
| O | -8.432576  | -5.240264  | -3.183234 |
| H | -6.404576  | -5.771770  | -3.367013 |
| H | -7.545944  | -6.603006  | -4.472310 |
| H | -4.439960  | -6.813445  | -0.880471 |
| H | -5.014471  | -5.847426  | -2.285545 |
| H | -4.688089  | -5.040273  | -0.711114 |
| C | -2.613417  | -9.535474  | 1.773185  |
| H | -2.625753  | -10.087782 | -0.324173 |
| H | -2.865544  | -8.884543  | 3.809822  |
| H | -4.919859  | -7.953291  | 4.689854  |
| H | -8.533296  | -7.088729  | 4.563542  |
| H | -7.171689  | -7.569181  | 5.626213  |
| O | -7.271324  | -5.606609  | 4.854220  |
| H | -9.564044  | -8.835632  | 1.923251  |
| H | -9.648636  | -7.927262  | 3.473944  |
| H | -10.461792 | -7.279796  | 2.006497  |
| C | -8.384745  | -4.070077  | -3.881338 |
| H | -1.583308  | -9.877995  | 1.918095  |
| C | -6.251199  | -5.115918  | 5.618247  |
| C | -9.440139  | -3.101367  | -3.478720 |
| O | -7.540318  | -3.918685  | -4.743743 |
| O | -5.521187  | -5.885334  | 6.217110  |
| C | -6.164482  | -3.630543  | 5.634493  |
| C | -10.091716 | -2.366920  | -4.470378 |
| C | -9.761266  | -2.909804  | -2.133649 |
| C | -7.272443  | -2.822243  | 5.369272  |
| C | -4.931601  | -3.047262  | 5.934223  |
| C | -11.068310 | -1.437997  | -4.108874 |
| H | -9.836235  | -2.517741  | -5.527679 |
| C | -10.735528 | -1.980604  | -1.784367 |
| H | -9.249481  | -3.488729  | -1.354676 |
| C | -7.142006  | -1.438212  | 5.402562  |
| H | -8.244659  | -3.270146  | 5.131312  |

|   |            |           |            |
|---|------------|-----------|------------|
| C | -4.810750  | -1.656662 | 5.969086   |
| H | -4.056716  | -3.683166 | 6.139220   |
| C | -11.762683 | -0.677695 | -5.184201  |
| C | -11.390169 | -1.243016 | -2.764709  |
| H | -10.987277 | -1.828300 | -0.729265  |
| C | -5.917501  | -0.849111 | 5.699631   |
| H | -8.010726  | -0.805344 | 5.190393   |
| C | -3.477043  | -1.074226 | 6.273680   |
| O | -11.939052 | 0.642682  | -4.881617  |
| O | -12.170231 | -1.123216 | -6.240072  |
| H | -12.153353 | -0.509433 | -2.480119  |
| H | -5.825809  | 0.244245  | 5.718544   |
| O | -2.395202  | -1.584036 | 6.040190   |
| O | -3.520535  | 0.138547  | 6.893470   |
| C | -12.522386 | 1.522138  | -5.836590  |
| C | -2.272280  | 0.770762  | 7.192021   |
| C | -11.494974 | 2.106339  | -6.767547  |
| H | -12.966166 | 2.284726  | -5.170824  |
| H | -13.342923 | 1.040122  | -6.403557  |
| C | -2.573398  | 2.152708  | 7.696589   |
| H | -1.614610  | 0.813204  | 6.292032   |
| H | -1.743696  | 0.171223  | 7.960614   |
| C | -10.755005 | 3.279654  | -6.421098  |
| C | -11.263545 | 1.499320  | -7.975995  |
| C | -2.709307  | 3.261706  | 6.803794   |
| C | -2.659966  | 2.362435  | 9.049580   |
| C | -9.794227  | 3.798132  | -7.274458  |
| O | -10.953563 | 3.828929  | -5.155541  |
| C | -10.294487 | 2.011983  | -8.876672  |
| H | -11.822138 | 0.595755  | -8.258953  |
| C | -2.851296  | 4.551558  | 7.289822   |
| O | -2.802943  | 3.033426  | 5.433907   |
| C | -2.846163  | 3.666722  | 9.575587   |
| H | -2.576215  | 1.520864  | 9.749428   |
| C | -9.010909  | 4.997652  | -6.913972  |
| C | -9.550926  | 3.158269  | -8.529955  |
| C | -11.833725 | 4.932762  | -5.150285  |
| C | -10.060200 | 1.371386  | -10.124241 |
| C | -2.919697  | 5.713093  | 6.380106   |
| C | -2.923941  | 4.769511  | 8.700801   |
| C | -1.555186  | 2.893822  | 4.785160   |
| C | -2.937910  | 3.873611  | 10.979207  |
| C | -9.436632  | 6.277493  | -7.389684  |
| C | -7.877582  | 4.908945  | -6.121830  |
| C | -8.575992  | 3.641387  | -9.447260  |
| H | -11.500952 | 5.733811  | -5.823588  |
| H | -12.856329 | 4.636317  | -5.412311  |
| H | -11.793320 | 5.267437  | -4.111001  |
| C | -9.117162  | 1.860122  | -10.986271 |
| H | -10.645544 | 0.479785  | -10.377827 |
| C | -1.703207  | 6.347877  | 5.976540   |
| C | -4.130462  | 6.195016  | 5.911184   |
| C | -3.075488  | 6.070619  | 9.257152   |
| H | -1.045795  | 1.969866  | 5.100177   |
| H | -1.838150  | 2.830559  | 3.731878   |
| H | -0.898589  | 3.756398  | 4.955068   |
| C | -3.091786  | 5.135537  | 11.484053  |
| H | -2.882808  | 3.005525  | 11.645957  |
| C | -8.699706  | 7.426941  | -7.038550  |
| C | -10.588981 | 6.431629  | -8.210623  |
| C | -7.140018  | 6.078252  | -5.756869  |

|   |            |          |            |
|---|------------|----------|------------|
| O | -7.486350  | 3.692169 | -5.567235  |
| C | -8.367364  | 3.008402 | -10.642208 |
| H | -7.998980  | 4.535376 | -9.179146  |
| H | -8.931768  | 1.369536 | -11.947392 |
| C | -0.428722  | 5.886349 | 6.410215   |
| C | -1.761650  | 7.463052 | 5.116124   |
| C | -4.186647  | 7.331136 | 5.044654   |
| O | -5.296593  | 5.493071 | 6.212860   |
| C | -3.156747  | 6.246256 | 10.611622  |
| H | -3.118549  | 6.931573 | 8.577852   |
| H | -3.163024  | 5.300051 | 12.564075  |
| C | -9.117054  | 8.701754 | -7.509868  |
| C | -7.553182  | 7.304623 | -6.211600  |
| C | -10.971822 | 7.668659 | -8.652420  |
| H | -11.159707 | 5.536461 | -8.488536  |
| C | -5.926187  | 5.994748 | -4.873890  |
| C | -6.696190  | 2.902477 | -6.431213  |
| H | -7.616776  | 3.384778 | -11.345189 |
| C | 0.718663   | 6.508389 | 5.997525   |
| H | -0.381242  | 5.017363 | 7.078998   |
| C | -0.557305  | 8.095481 | 4.704003   |
| C | -3.018555  | 7.941410 | 4.663277   |
| C | -5.495834  | 7.886791 | 4.555320   |
| C | -6.065483  | 6.082615 | 7.238851   |
| H | -3.270971  | 7.249688 | 11.034845  |
| H | -8.533428  | 9.585886 | -7.228550  |
| C | -10.228476 | 8.818176 | -8.298748  |
| H | -7.002818  | 8.213990 | -5.936900  |
| H | -11.857611 | 7.781340 | -9.286335  |
| O | -6.414567  | 6.059076 | -3.530872  |
| H | -5.358751  | 5.057917 | -5.038670  |
| H | -5.236492  | 6.842517 | -5.053128  |
| H | -5.722744  | 3.367475 | -6.626940  |
| H | -6.565729  | 1.980191 | -5.859972  |
| H | -7.202146  | 2.695308 | -7.383387  |
| C | 0.653263   | 7.627031 | 5.136160   |
| H | 1.700225   | 6.143258 | 6.324663   |
| H | -0.613745  | 8.957549 | 4.028252   |
| H | -3.041578  | 8.808730 | 3.988550   |
| H | -6.306864  | 7.731537 | 5.297515   |
| H | -5.417758  | 8.973378 | 4.354978   |
| O | -6.006449  | 7.169328 | 3.438839   |
| H | -5.487819  | 6.233711 | 8.159412   |
| H | -6.498317  | 7.039233 | 6.908793   |
| H | -6.857064  | 5.347769 | 7.402166   |
| H | -10.553638 | 9.797696 | -8.664209  |
| C | -5.525722  | 5.886946 | -2.511604  |
| H | 1.585975   | 8.112401 | 4.808237   |
| C | -5.647212  | 7.529774 | 2.170590   |
| C | -6.178831  | 5.886101 | -1.173912  |
| O | -4.340474  | 5.771291 | -2.755829  |
| O | -4.924073  | 8.494448 | 2.001569   |
| C | -6.236265  | 6.668644 | 1.108900   |
| C | -5.633539  | 6.662435 | -0.151720  |
| C | -7.313959  | 5.107743 | -0.941837  |
| C | -7.372244  | 5.889188 | 1.341919   |
| H | -4.735091  | 7.266890 | -0.337191  |
| C | -7.902419  | 5.112074 | 0.317970   |
| H | -7.741328  | 4.498709 | -1.748103  |
| H | -7.851499  | 5.881520 | 2.328203   |
| H | -8.791088  | 4.499292 | 0.504214   |

C60@4c (E = 0.76332958 Ha)

|   |            |           |           |
|---|------------|-----------|-----------|
| C | 10.471103  | 3.826462  | -1.980098 |
| C | 9.219015   | 4.371491  | -1.895059 |
| C | 8.216705   | 4.038950  | -2.848698 |
| C | 8.536671   | 3.129193  | -3.876547 |
| C | 9.845989   | 2.579051  | -3.946863 |
| C | 10.790545  | 2.921537  | -3.018561 |
| H | 11.240012  | 4.086103  | -1.244894 |
| H | 8.968376   | 5.075844  | -1.091911 |
| C | 6.901487   | 4.595369  | -2.792713 |
| C | 7.550310   | 2.763179  | -4.828165 |
| H | 10.080868  | 1.876756  | -4.755227 |
| H | 11.800000  | 2.500368  | -3.067868 |
| C | 6.277287   | 3.271256  | -4.760158 |
| C | 5.956050   | 4.208238  | -3.728866 |
| H | 7.824834   | 2.058637  | -5.625647 |
| C | 6.579057   | 5.567986  | -1.728827 |
| C | 6.849834   | 6.955950  | -1.940928 |
| C | 6.018164   | 5.159106  | -0.530641 |
| C | 7.440335   | 7.434439  | -3.143852 |
| C | 6.530223   | 7.884134  | -0.929080 |
| C | 5.681975   | 6.104304  | 0.488479  |
| C | 7.691720   | 8.768607  | -3.315255 |
| H | 7.697735   | 6.710588  | -3.927454 |
| C | 6.798183   | 9.265585  | -1.131385 |
| C | 5.938367   | 7.435547  | 0.280504  |
| C | 7.365931   | 9.696201  | -2.299260 |
| H | 8.149453   | 9.131879  | -4.241442 |
| H | 6.540034   | 9.975480  | -0.336888 |
| H | 5.677068   | 8.177888  | 1.047532  |
| H | 7.574244   | 10.759088 | -2.459795 |
| O | 5.687878   | 3.815221  | -0.364619 |
| O | 4.639023   | 4.653900  | -3.621404 |
| C | 5.257802   | 2.845362  | -5.781319 |
| H | 4.342987   | 3.465068  | -5.755572 |
| H | 5.685624   | 2.907336  | -6.801392 |
| C | 5.051005   | 5.669046  | 1.782990  |
| O | 4.714576   | 1.561132  | -5.486340 |
| C | 5.226876   | 0.445536  | -6.082908 |
| O | 6.172486   | 0.539493  | -6.843319 |
| C | 4.515205   | -0.812560 | -5.721182 |
| C | 3.132419   | -0.837644 | -5.532889 |
| C | 5.258065   | -1.990341 | -5.613578 |
| C | 2.490783   | -2.041814 | -5.263797 |
| H | 2.546411   | 0.086412  | -5.601839 |
| C | 4.618020   | -3.193005 | -5.338787 |
| H | 6.345200   | -1.969207 | -5.758420 |
| C | 3.231946   | -3.221397 | -5.179328 |
| H | 1.395537   | -2.067602 | -5.128937 |
| H | 5.200587   | -4.118189 | -5.251350 |
| C | 2.560555   | -4.528265 | -4.928405 |
| O | 2.964303   | -5.441227 | -4.235499 |
| O | 1.385967   | -4.648166 | -5.614817 |
| O | -13.029594 | 0.811382  | -0.648736 |
| C | -12.091988 | 0.202318  | -0.176256 |
| C | -11.292641 | -0.876948 | -0.821834 |
| O | -11.671629 | 0.458628  | 1.101050  |
| C | -9.919597  | -0.690730 | -0.991411 |
| C | -11.910223 | -2.045745 | -1.263430 |

|   |            |           |           |
|---|------------|-----------|-----------|
| C | -9.164049  | -1.680929 | -1.605488 |
| H | -9.436386  | 0.227971  | -0.634873 |
| C | -11.148888 | -3.044227 | -1.864242 |
| H | -12.990549 | -2.180396 | -1.137116 |
| C | -9.777708  | -2.859521 | -2.033227 |
| H | -8.080844  | -1.538294 | -1.752622 |
| H | -11.625507 | -3.973058 | -2.198032 |
| C | -8.938820  | -3.933971 | -2.634031 |
| O | -8.226310  | -3.497388 | -3.723511 |
| O | -8.854849  | -5.089367 | -2.274221 |
| C | -7.075495  | -4.213675 | -4.142566 |
| C | -5.821563  | -3.801504 | -3.418221 |
| H | -7.016559  | -3.923937 | -5.207426 |
| H | -7.222675  | -5.315711 | -4.081393 |
| C | -5.759488  | -2.649909 | -2.677066 |
| C | -4.648116  | -4.615050 | -3.529855 |
| C | -4.566654  | -2.266737 | -2.010812 |
| H | -6.639736  | -1.993379 | -2.572478 |
| C | -3.462391  | -4.257779 | -2.910595 |
| O | -4.669200  | -5.736256 | -4.358441 |
| C | -3.410567  | -3.064137 | -2.124425 |
| C | -4.531885  | -1.084532 | -1.222467 |
| C | -2.255493  | -5.099829 | -3.038604 |
| C | -2.232489  | -2.657875 | -1.438573 |
| C | -3.385017  | -0.721092 | -0.570881 |
| H | -5.439374  | -0.473197 | -1.142065 |
| C | -1.984208  | -6.074449 | -2.028038 |
| C | -1.400758  | -4.985237 | -4.122998 |
| C | -2.223386  | -1.518830 | -0.679240 |
| H | -1.334179  | -3.283560 | -1.519053 |
| H | -3.362626  | 0.194122  | 0.041216  |
| C | -2.837686  | -6.253250 | -0.903587 |
| C | -0.843027  | -6.893147 | -2.146614 |
| C | -0.266507  | -5.845427 | -4.260738 |
| O | -1.692586  | -4.121001 | -5.176667 |
| H | -1.313181  | -1.221895 | -0.141300 |
| C | -2.547904  | -7.190117 | 0.050674  |
| H | -3.731982  | -5.623278 | -0.815259 |
| C | -0.559267  | -7.855573 | -1.139419 |
| C | 0.002535   | -6.764951 | -3.278823 |
| C | 0.595364   | -5.822075 | -5.492722 |
| C | -1.393842  | -7.998633 | -0.064969 |
| H | -3.207420  | -7.323317 | 0.914757  |
| H | 0.337197   | -8.478127 | -1.241541 |
| H | 0.879529   | -7.422157 | -3.358467 |
| H | -1.180006  | -8.738480 | 0.713283  |
| O | 2.986461   | 7.413324  | 1.948264  |
| C | 2.723843   | 6.280140  | 1.598148  |
| C | 1.398628   | 5.764157  | 1.152524  |
| O | 3.685955   | 5.309565  | 1.613795  |
| C | 0.288822   | 5.906622  | 1.985574  |
| C | 1.271243   | 5.171200  | -0.103840 |
| C | -0.954129  | 5.451324  | 1.560796  |
| H | 0.394474   | 6.379825  | 2.968578  |
| C | 0.024419   | 4.729304  | -0.534552 |
| H | 2.149514   | 5.050682  | -0.750547 |
| C | -1.083255  | 4.870744  | 0.299210  |
| H | -1.829824  | 5.550014  | 2.213958  |
| H | -0.082725  | 4.273792  | -1.525547 |
| C | -2.425583  | 4.422683  | -0.168334 |
| O | -2.837303  | 3.279608  | 0.463981  |

|   |            |           |           |
|---|------------|-----------|-----------|
| O | -3.122231  | 4.943190  | -1.013951 |
| C | -4.157898  | 2.798205  | 0.260435  |
| C | -5.179820  | 3.439769  | 1.158259  |
| H | -4.027644  | 1.720989  | 0.504161  |
| H | -4.457946  | 2.879390  | -0.808534 |
| C | -4.814315  | 4.057089  | 2.327260  |
| C | -6.567147  | 3.388578  | 0.806545  |
| C | -5.780945  | 4.661316  | 3.172601  |
| H | -3.760370  | 4.099377  | 2.635012  |
| C | -7.533796  | 3.971112  | 1.608914  |
| O | -6.966580  | 2.645951  | -0.304153 |
| C | -7.144308  | 4.626341  | 2.818188  |
| C | -5.384363  | 5.304892  | 4.376687  |
| C | -8.964822  | 3.920286  | 1.245875  |
| C | -8.090996  | 5.244309  | 3.681711  |
| C | -6.317338  | 5.889981  | 5.188405  |
| H | -4.320834  | 5.322659  | 4.641186  |
| C | -9.519403  | 4.956724  | 0.432664  |
| C | -9.775227  | 2.882064  | 1.674354  |
| C | -7.685803  | 5.859806  | 4.834814  |
| H | -9.151902  | 5.222114  | 3.401937  |
| H | -6.016540  | 6.387171  | 6.116400  |
| C | -8.738181  | 6.051561  | -0.031287 |
| C | -10.882896 | 4.899900  | 0.078584  |
| C | -11.153619 | 2.817198  | 1.298816  |
| O | -9.198937  | 1.837149  | 2.394699  |
| H | -8.417321  | 6.336688  | 5.495596  |
| C | -9.300030  | 7.030832  | -0.804636 |
| H | -7.677471  | 6.098004  | 0.246995  |
| C | -11.443626 | 5.928731  | -0.726540 |
| C | -11.683222 | 3.813434  | 0.518716  |
| C | -12.034216 | 1.677043  | 1.734623  |
| C | -10.667759 | 6.969886  | -1.157503 |
| H | -8.695256  | 7.872531  | -1.158564 |
| H | -12.504545 | 5.869563  | -0.996115 |
| H | -12.737573 | 3.777312  | 0.211523  |
| H | -11.860775 | 1.422468  | 2.801378  |
| H | -13.107219 | 1.913240  | 1.599035  |
| H | -11.094835 | 7.764257  | -1.778386 |
| H | -0.017658  | -5.747203 | -6.409564 |
| H | 1.220826   | -6.733400 | -5.562378 |
| H | 5.483621   | 4.710621  | 2.139644  |
| H | 5.185401   | 6.429097  | 2.576899  |
| C | 3.490963   | -0.171175 | 5.701602  |
| C | 2.694054   | -1.149122 | 6.270721  |
| C | 4.924286   | -0.392260 | 5.556969  |
| C | 3.026301   | 0.554789  | 4.526368  |
| C | 3.288175   | -2.399967 | 6.725428  |
| C | 1.390145   | -1.452895 | 5.694828  |
| C | 5.488433   | -1.580006 | 5.988646  |
| C | 5.345338   | 0.196961  | 4.292260  |
| C | 4.172423   | 0.782390  | 3.655316  |
| C | 1.788166   | 0.266346  | 3.979421  |
| C | 4.649201   | -2.609848 | 6.588114  |
| C | 2.351372   | -3.476852 | 6.430611  |
| C | 1.178359   | -2.891546 | 5.793665  |
| C | 0.948971   | -0.763518 | 4.578805  |
| C | 6.503694   | -2.241369 | 5.178714  |
| C | 6.309270   | -0.431141 | 3.523074  |
| C | 4.022584   | 0.709778  | 2.281534  |
| C | 1.630308   | 0.190406  | 2.532485  |



|   |            |           |           |
|---|------------|-----------|-----------|
| C | 5.145830   | -3.907687 | 6.148561  |
| C | 2.822932   | -4.709186 | 6.013103  |
| C | 0.536111   | -3.568150 | 4.771458  |
| C | 0.272505   | -1.476039 | 3.502253  |
| C | 6.291977   | -3.679958 | 5.277502  |
| C | 6.903552   | -1.681746 | 3.977743  |
| C | 6.151719   | -0.507114 | 2.076155  |
| C | 2.718786   | 0.406176  | 1.705525  |
| C | 5.038895   | 0.050525  | 1.470121  |
| C | 0.693630   | -0.886490 | 2.237600  |
| C | 4.256299   | -4.930193 | 5.868422  |
| C | 2.146455   | -5.421833 | 4.936654  |
| C | 1.032679   | -4.866021 | 4.331859  |
| C | 0.071630   | -2.842049 | 3.596090  |
| C | 6.490696   | -4.486164 | 4.170303  |
| C | 7.113139   | -2.530749 | 2.811850  |
| C | 6.648424   | -1.804796 | 1.636651  |
| C | 2.928153   | -0.442676 | 0.539543  |
| C | 4.361541   | -0.663466 | 0.394554  |
| C | 0.890518   | -1.692009 | 1.128971  |
| C | 4.465694   | -5.779377 | 4.702526  |
| C | 3.161765   | -6.083202 | 4.126630  |
| C | 0.874978   | -4.942046 | 2.884868  |
| C | 0.281202   | -3.691120 | 2.430258  |
| C | 5.553961   | -5.563118 | 3.875356  |
| C | 6.911909   | -3.896779 | 2.905598  |
| C | 6.005990   | -2.481317 | 0.614500  |
| C | 2.038380   | -1.464925 | 0.259183  |
| C | 4.833010   | -1.895839 | -0.022549 |
| C | 0.681005   | -3.131468 | 1.229372  |
| C | 3.012063   | -6.155313 | 2.752743  |
| C | 1.839006   | -5.569872 | 2.115758  |
| C | 5.396335   | -5.639362 | 2.428419  |
| C | 6.235610   | -4.609405 | 1.829006  |
| C | 5.794284   | -3.920022 | 0.713107  |
| C | 2.535132   | -2.762871 | -0.180125 |
| C | 3.896159   | -2.972845 | -0.317286 |
| C | 1.696115   | -3.792738 | 0.419313  |
| C | 4.158213   | -5.927679 | 1.881543  |
| C | 2.260254   | -4.980433 | 0.851063  |
| C | 4.490252   | -4.223783 | 0.137065  |
| C | 3.693471   | -5.201732 | 0.706063  |
| C | 6.600427   | 3.111532  | 0.450581  |
| H | 7.619422   | 3.138133  | 0.045931  |
| H | 6.596302   | 3.499708  | 1.480876  |
| H | 6.204746   | 2.090449  | 0.435159  |
| C | 4.402797   | 5.883615  | -4.274233 |
| H | 5.055845   | 6.683187  | -3.900160 |
| H | 4.517898   | 5.796160  | -5.361071 |
| H | 3.360697   | 6.093497  | -4.021465 |
| C | -6.847889  | 3.345473  | -1.526807 |
| H | -7.382267  | 4.303461  | -1.511451 |
| H | -5.790387  | 3.508947  | -1.783645 |
| H | -7.311193  | 2.661711  | -2.241850 |
| C | -9.490381  | 1.875060  | 3.775340  |
| H | -9.175561  | 2.818887  | 4.237734  |
| H | -10.562075 | 1.707157  | 3.962508  |
| H | -8.903445  | 1.042103  | 4.168972  |
| C | -1.308626  | -2.782711 | -4.946258 |
| H | -1.724032  | -2.383072 | -4.011687 |
| H | -0.213125  | -2.662294 | -4.940482 |

|   |           |           |           |
|---|-----------|-----------|-----------|
| H | -1.734992 | -2.261356 | -5.806779 |
| C | -5.227272 | -6.878137 | -3.740060 |
| H | -4.732576 | -7.121024 | -2.791787 |
| H | -6.307795 | -6.745811 | -3.577247 |
| H | -5.047836 | -7.664528 | -4.476633 |

**References:**

**S1:** M. J. Frisch, G. W. Trucks, H. B. Schlegel, G. E. Scuseria, M. A. Robb, J. R. Cheeseman, J. A. Montgomery, Jr., T. Vreven, K. N. Kudin, J. C. Burant, J. M. Millam, S. S. Iyengar, J. Tomasi, V. Barone, B. Mennucci, M. Cossi, G. Scalmani, N. Rega, G. A. Petersson, H. Nakatsuji, M. Hada, M. Ehara, K. Toyota, R. Fukuda, J. Hasegawa, M. Ishida, T. Nakajima, Y. Honda, O. Kitao, H. Nakai, M. Klene, X. Li, J. E. Knox, H. P. Hratchian, J. B. Cross, C. Adamo, J. Jaramillo, R. Gomperts, R. E. Stratmann, O. Yazyev, A. J. Austin, R. Cammi, C. Pomelli, J. W. Ochterski, P. Y. Ayala, K. Morokuma, G. A. Voth, P. Salvador, J. J. Dannenberg, V. G. Zakrzewski, S. Dapprich, A. D. Daniels, M. C. Strain, O. Farkas, D. K. Malick, A. D. Rabuck, K. Raghavachari, J. B. Foresman, J. V. Ortiz, Q. Cui, A. G. Baboul, S. Clifford, J. Cioslowski, B. B. Stefanov, G. Liu, A. Liashenko, P. Piskorz, I. Komaromi, R. L. Martin, D. J. Fox, T. Keith, M. A. Al-Laham, C. Y. Peng, A. Nanayakkara, M. Challacombe, P. M. W. Gill, B. Johnson, W. Chen, M. W. Wong, C. Gonzalez, and J. A. Pople, *Gaussian 03, Revision B.02*, Gaussian, Inc., Pittsburgh PA, 2003.
